# Supplementary material for: Synthesis and DNA cleavage studies of rationally designed metallopeptides from N-salicyl-AA-picolamide (SAP) and Cu(ii) ions
Source: Royal Society of Chemistry journal article supplement (doi:10.1039/d4nj03573a), 2024-01-01
Supplement: d4nj03573a1.pdf [file d4nj03573a1.pdf]

## Supporting Information

### Synthesis and DNA Cleavage studies of Rationally Designed Metallopeptides from N-Salicyl-AA-Picolamide (SAP) and Cu(II) Ion

Subhashree Subhadarshini Panda <sup>a,c</sup>, Supriya Kumari<sup>a,b</sup>, Manjusha Dixit <sup>b,c</sup> and Nagendra K Sharma,<sup>\*a,c</sup>

<sup>a</sup>School of Chemical Science (SCS), National Institute of Science Education and Research (NISER), Bhubaneswar, Jatni, 752050, Odisha, India, E-mail: [nagendra@niser.ac.in](mailto:nagendra@niser.ac.in)

<sup>b</sup>School of Biological Science (SBS), National Institute of Science Education and Research (NISER), Bhubaneswar, Jatani, 752050, Odisha, India

<sup>c</sup>Homi Bhabha National Institute (HBNI), Anushaktinagar, Mumbai, 400094, India

\*Corresponding author. Tel.: 0674-249-4141; fax: +91 (674) 2494004;

Email: [nagendra@niser.ac.in](mailto:nagendra@niser.ac.in)

#### Contents

|                                                          |     |
|----------------------------------------------------------|-----|
| 1. General Procedure .....                               | S2  |
| 2. ESI-HRMS spectra of Cu Complex.....                   | S4  |
| 3. FTIR Spectra of Ligands 3a-3d & Cu complex 4a-4d..... | S8  |
| 4. EPR Spectra of Ligands 3a-3d & Cu complex 4a-4d.....  | S12 |
| 5. X-Ray Crystal structure of Cu complex 4a-4c. ....     | S12 |
| 6. Scanning Electron Microscopy (SEM).....               | S20 |
| 7. DNA Cleavage Assay .....                              | S24 |
| 8. Cell proliferation assay of SAP's Cu complexes.....   | S26 |
| 9. Theoretical Molecular docking studies.....            | S27 |

## 1. General Procedure

Except as otherwise specified, all commercial reagents were used without further purification. Natural and unnatural amino acids, salicylic acid, Picolyl amine, DIPA, NMM, EDC.HCl and HOBt were purchased from SpectroChem and sigma Aldrich. Anhydrous DMF was purchased from Merck. Reactions were carefully monitored by thin layer chromatography (TLC), and visualized under UV or by performing ninhydrin test. Silica gel column chromatography was carried out on Merck silica gel 100-200 mesh. Nuclear magnetic resonance (NMR) spectra were recorded on Bruker 400MHz spectrometer operating at 400MHz and 101 MHz for  $^1\text{H}$  and  $^{13}\text{C}$  acquisitions, respectively. All HRMS data were recorded with a Bruker MicroTOF-Q II spectrometer. **Synthesis of N-salicyl-AAAn-Picolamine Ligands and Cu- Complex**

*Synthesis of ligands 3a-3d*:- N-salicyl-AAAn-Picolamine ligands (**3a-3d**) has been synthesized according to the literature.

*Synthesis of Cu Complex 4a-4d*:- N-salicyl-AAAn-Picolamine ligands (**3a-3d**) (1eq each) was solubilized in 1:1 ratio of MeOH and DCM. Then 1eq  $\text{Cu}(\text{OAc})_2$  solution in methanol was added dropwise (Scheme S1). Then reaction mixtures were kept undisturbed to get needle shape crystals. Then crystals of each peptide (**4a-4d**) were washed with methanol and diethyl ether and characterised by mass spectrometry.

**Scheme S1.** Observation of complex formation

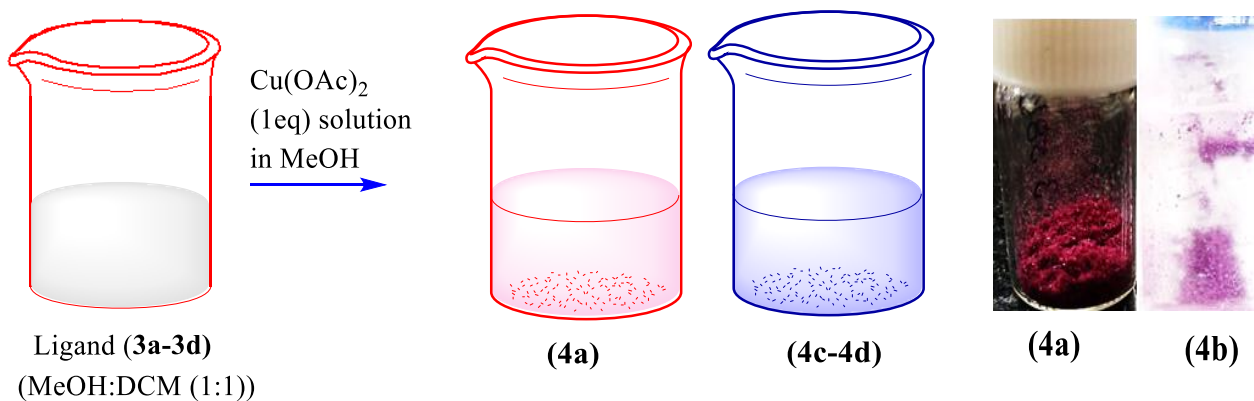

**TABLE-S1.** Calculated and found m/z values in ESI-MS of prepared Cu- complex **4a-4d**

| COMPOUND   | 4a       | 4b<br>(C <sub>16</sub> H <sub>16</sub> CuN <sub>3</sub> O <sub>3</sub><br>[M+H] <sup>+</sup> ) | 4c       | 4d       |
|------------|----------|------------------------------------------------------------------------------------------------|----------|----------|
| CALCULATED | 347.0331 | 361.0488                                                                                       | 389.0801 | 403.0957 |
| FOUND      | 347.0327 | 361.0496                                                                                       | 389.0762 | 403.0922 |

## 2. ESI-HRMS spectra of Cu Complex

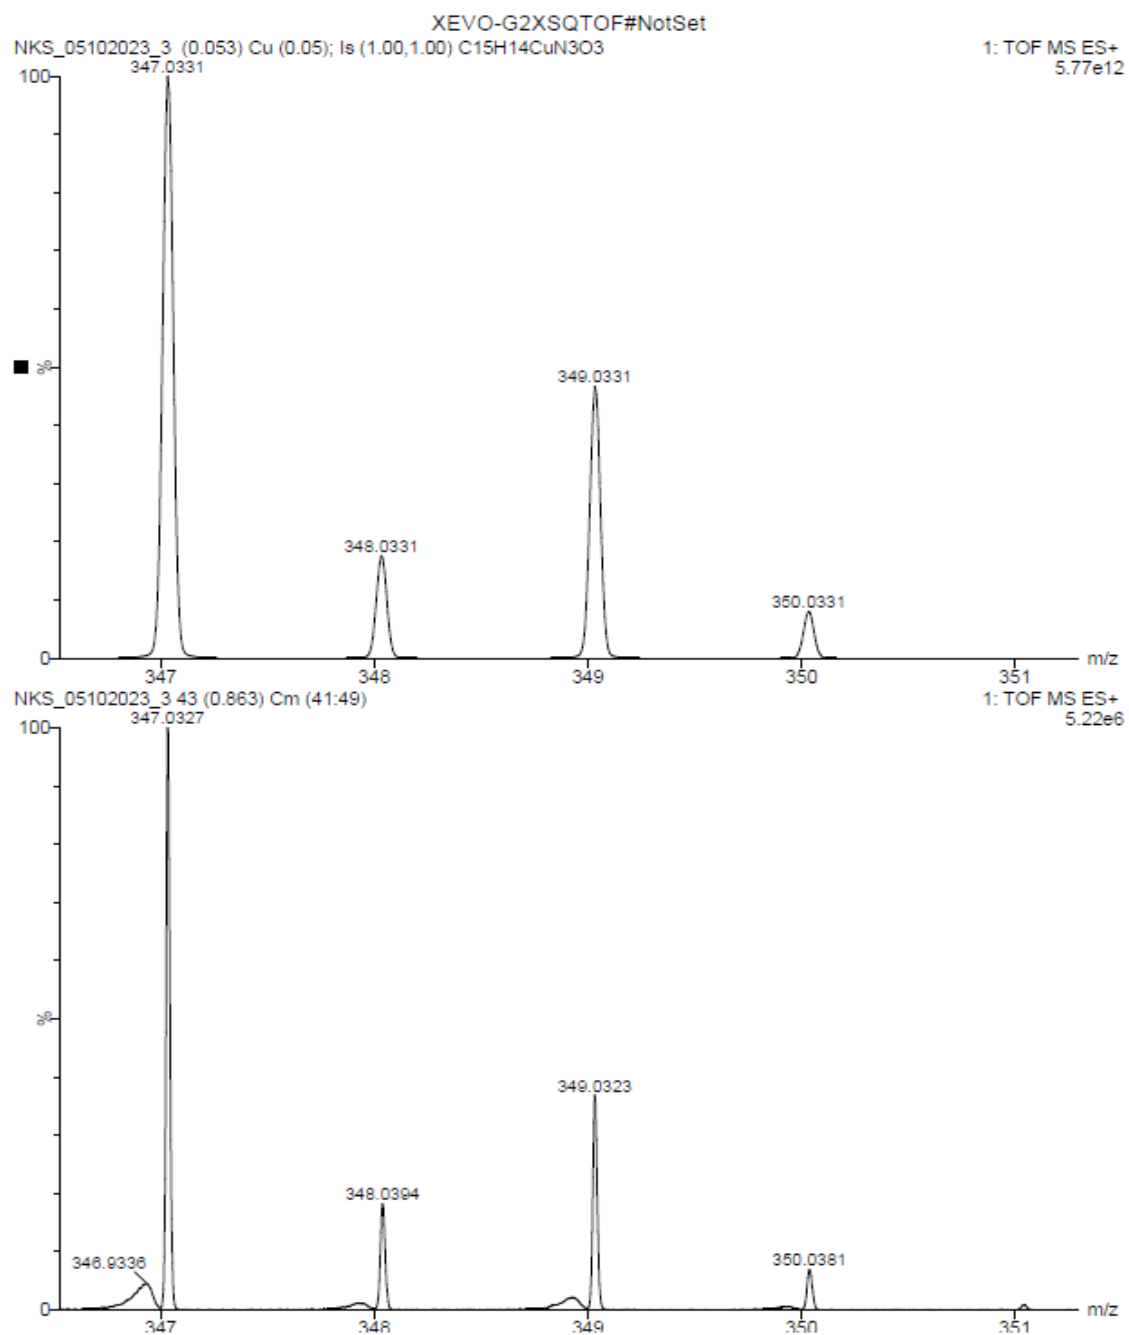

**Figure S1.** ESI-HRMS spectra of Cu Complex **4a**, Calculated (above) and Observed (below).

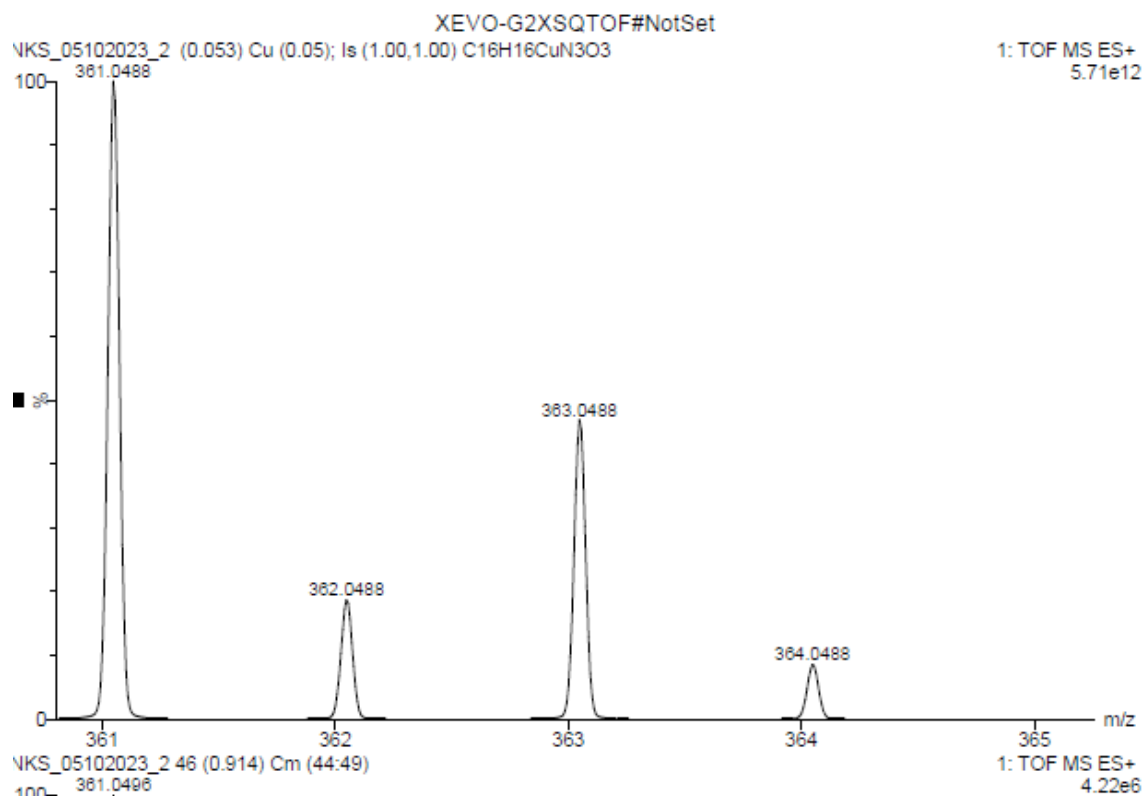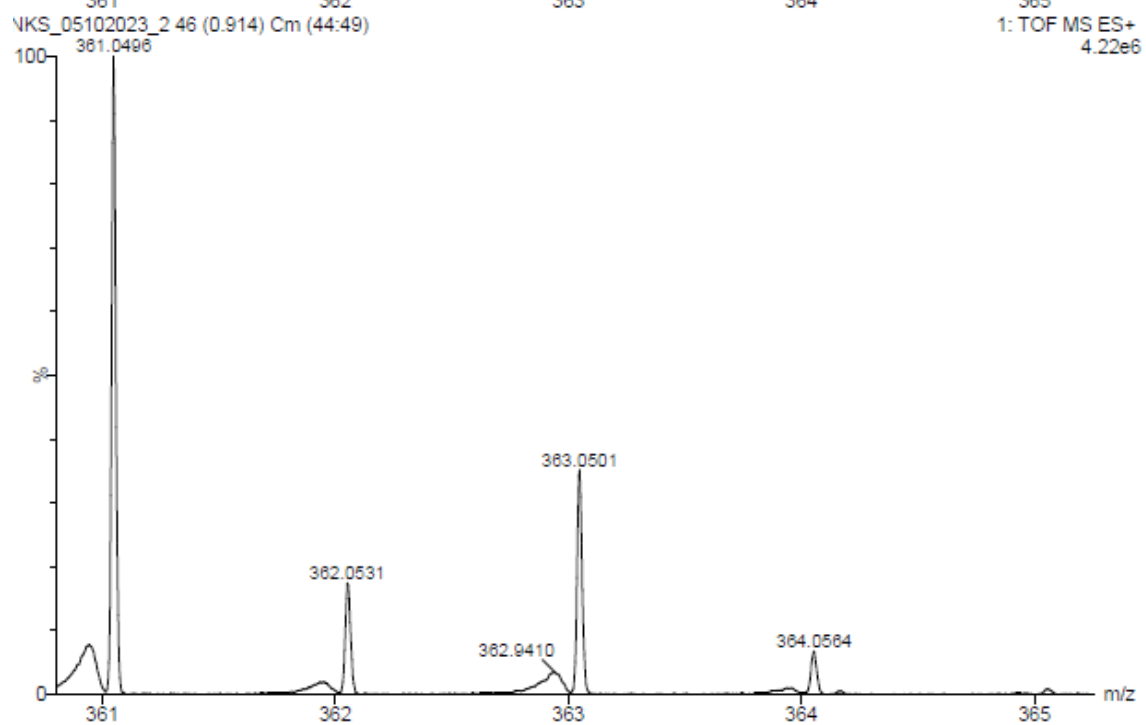

**Figure S2.** ESI-HRMS spectra of Cu Complex **4b**, Calculated (above) and Observed (below)

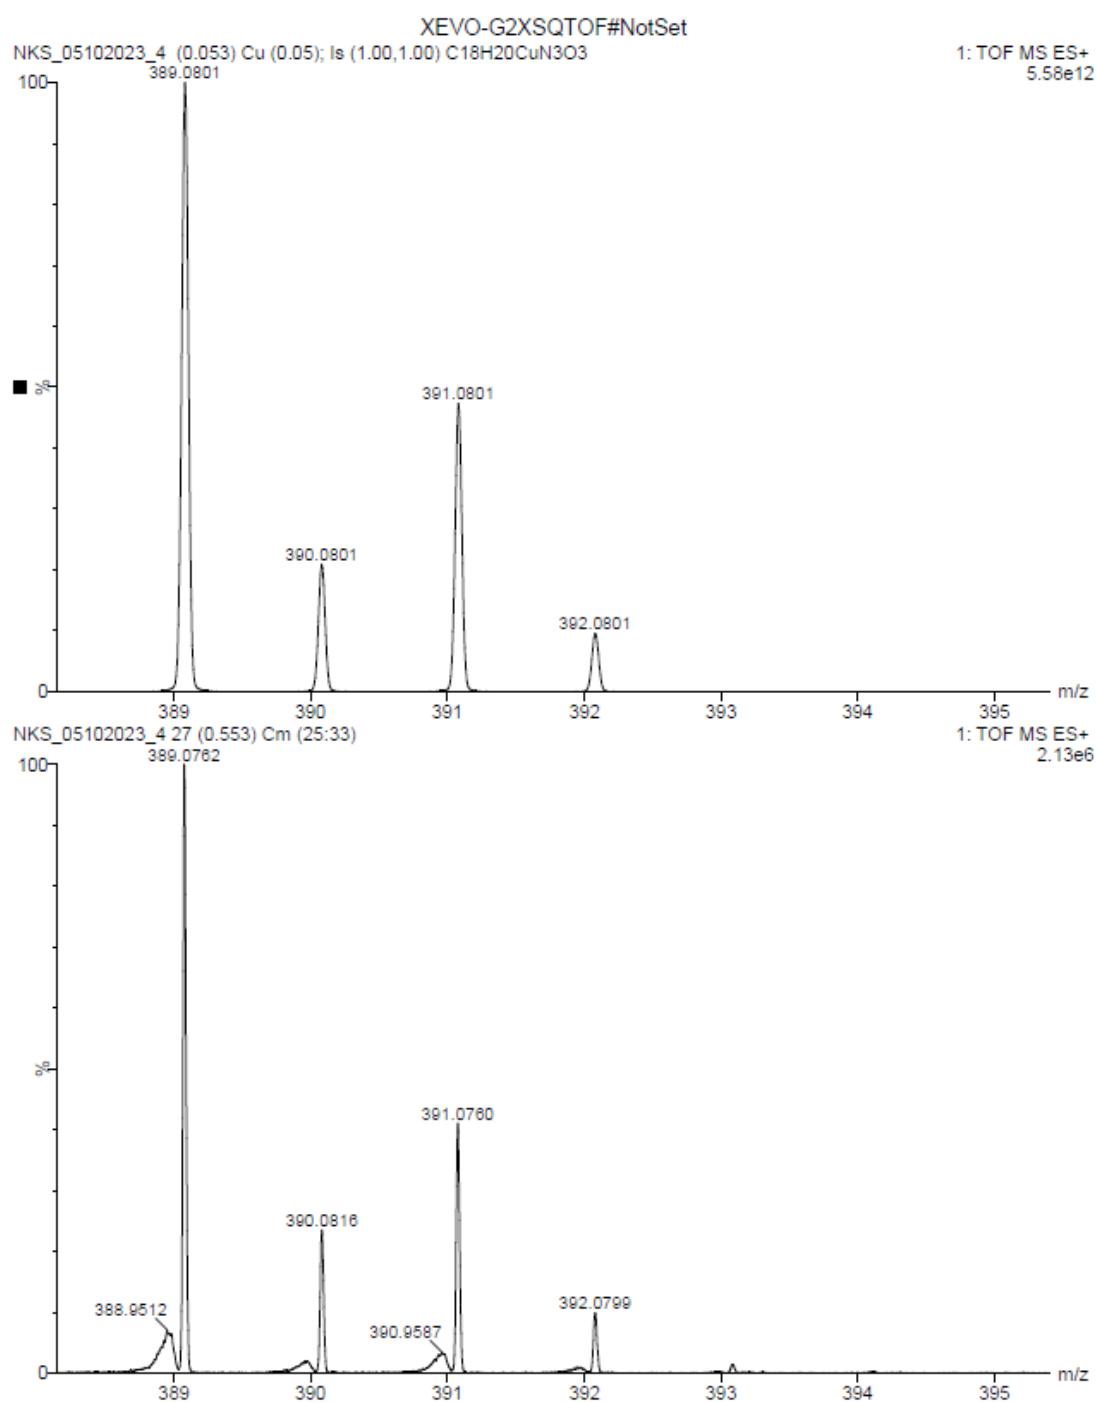

**Figure S3.** ESI-HRMS spectra of Cu Complex **4c**, Calculated (above) and Observed (below).

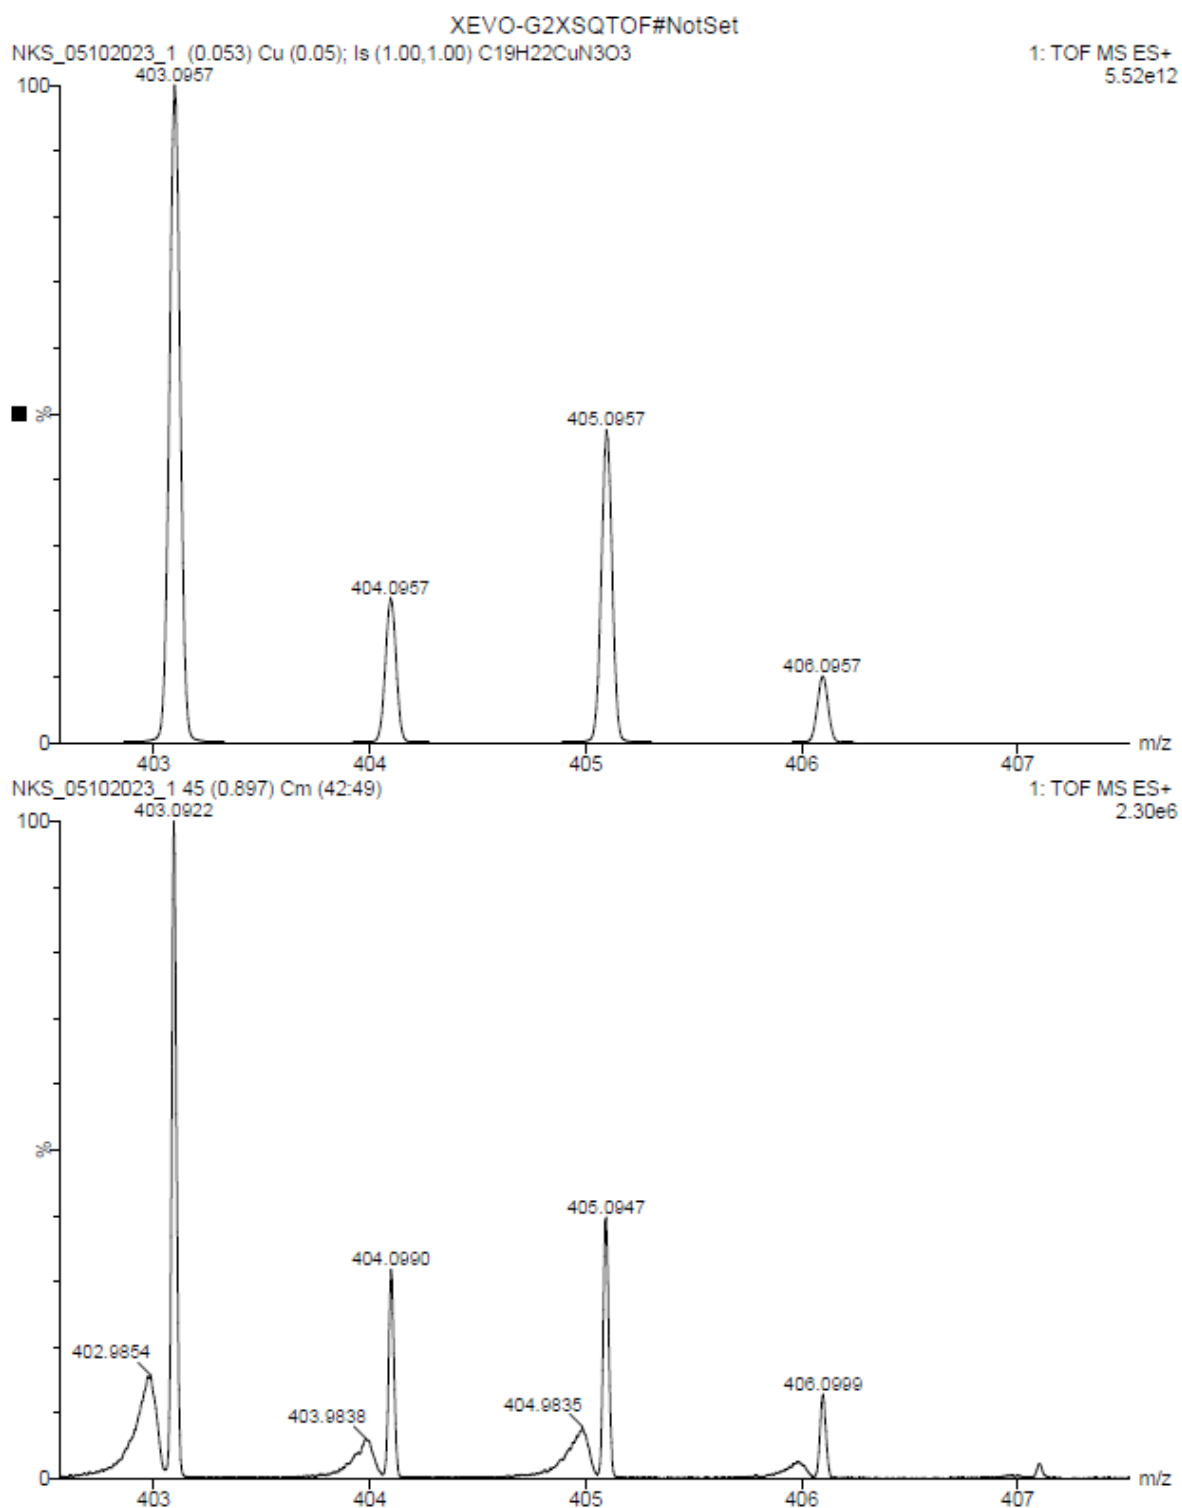

**Figure S4.** ESI-HRMS spectra of Cu Complex **4d**, Calculated (above) and Observed (below).

### 3. FTIR Spectra of Ligands 3a-3d & Cu complex 4a-4d

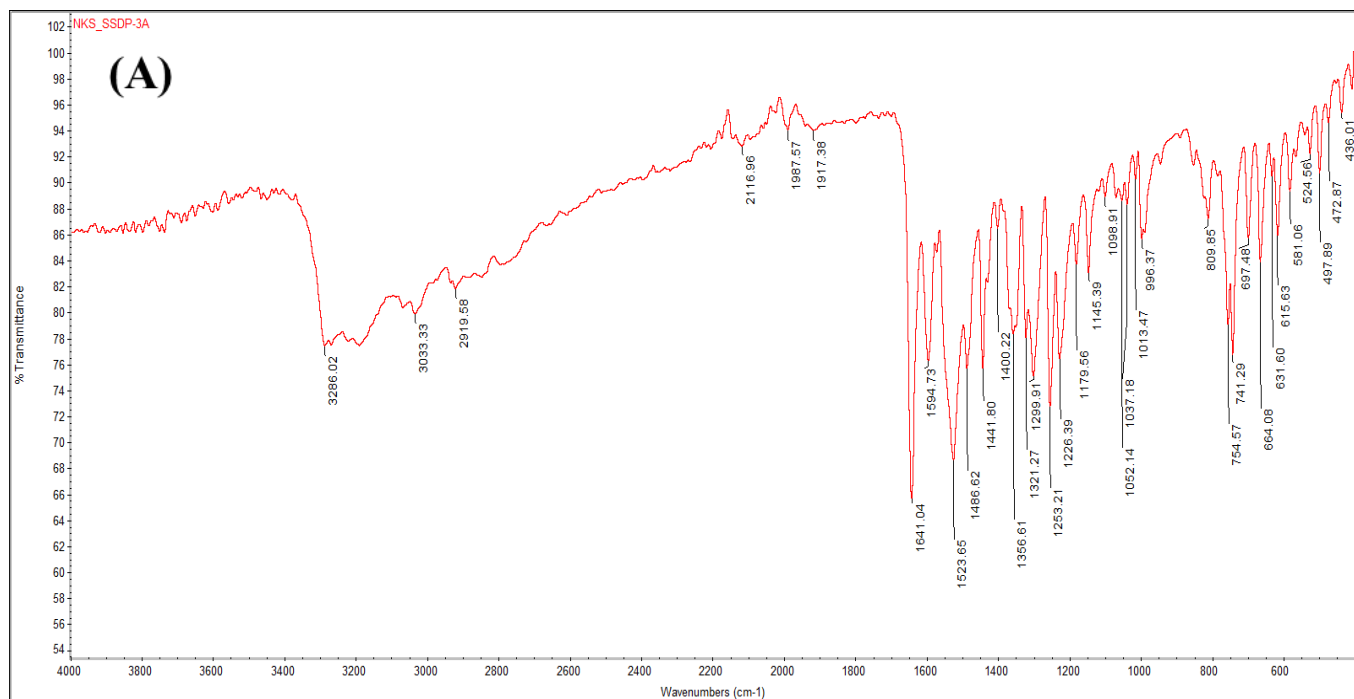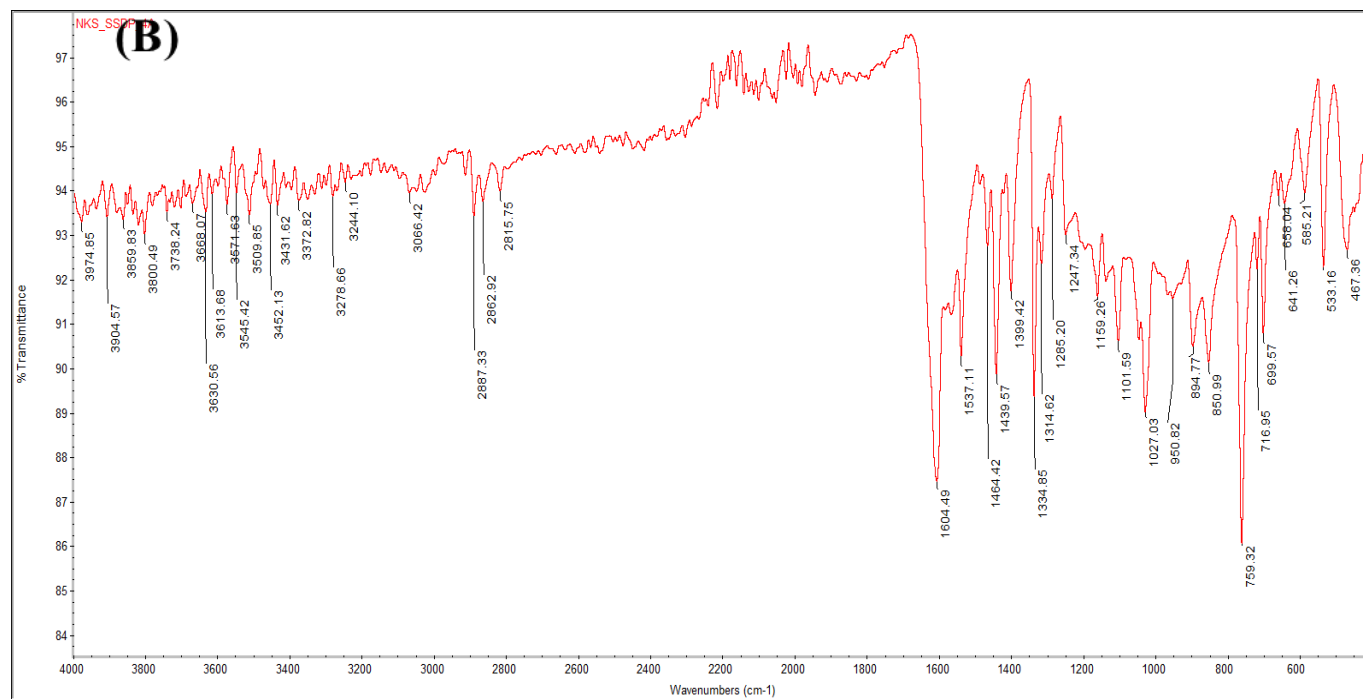

Figure S5. (A) FTIR Spectra of Ligands 4a; (B) FTIR Spectra of Cu complex 4a.



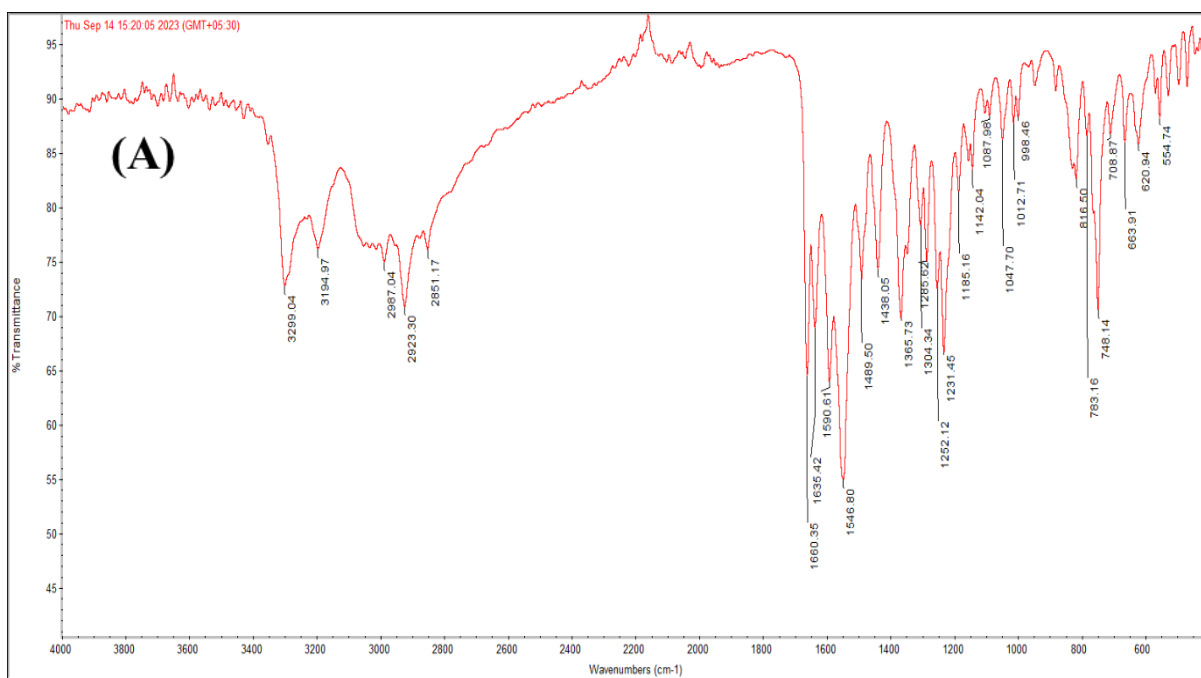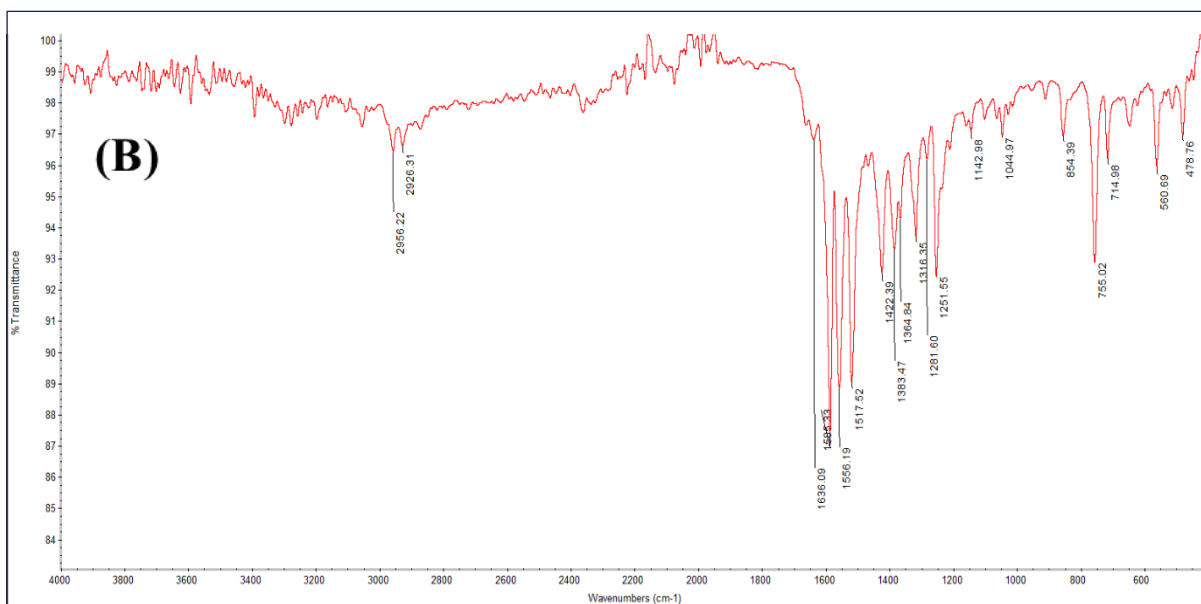

**Figure S6. (A) FTIR Spectra of Ligands 4b & (B) FTIR Spectra of Cu complex 4b.**

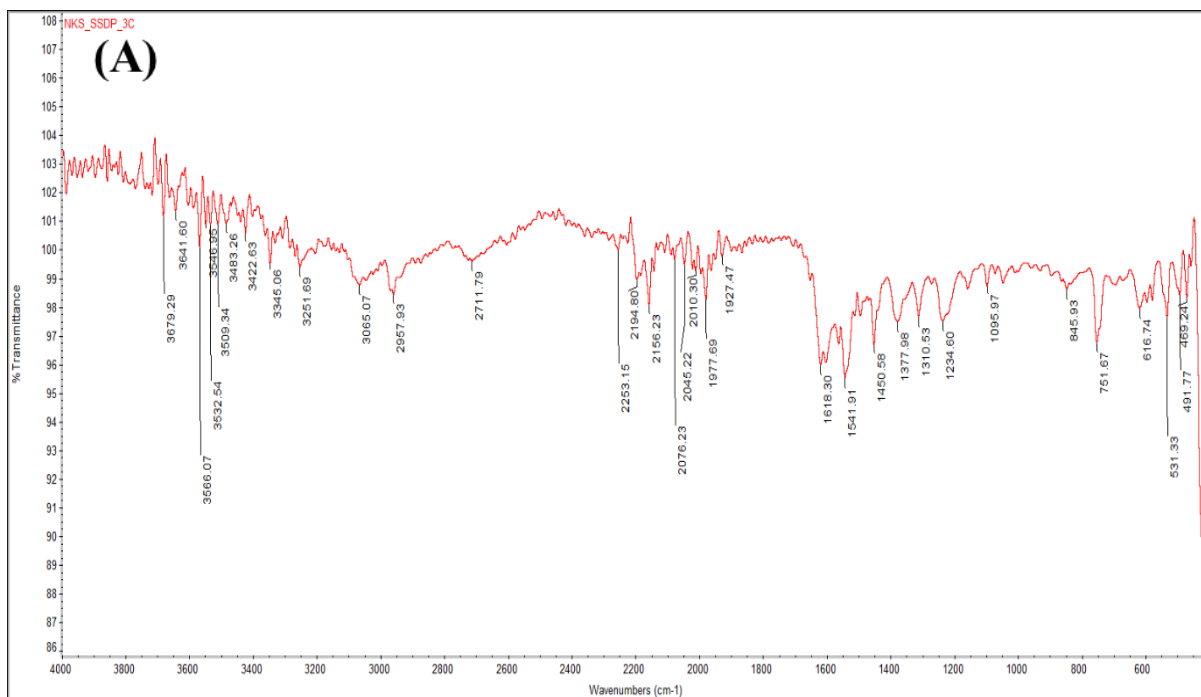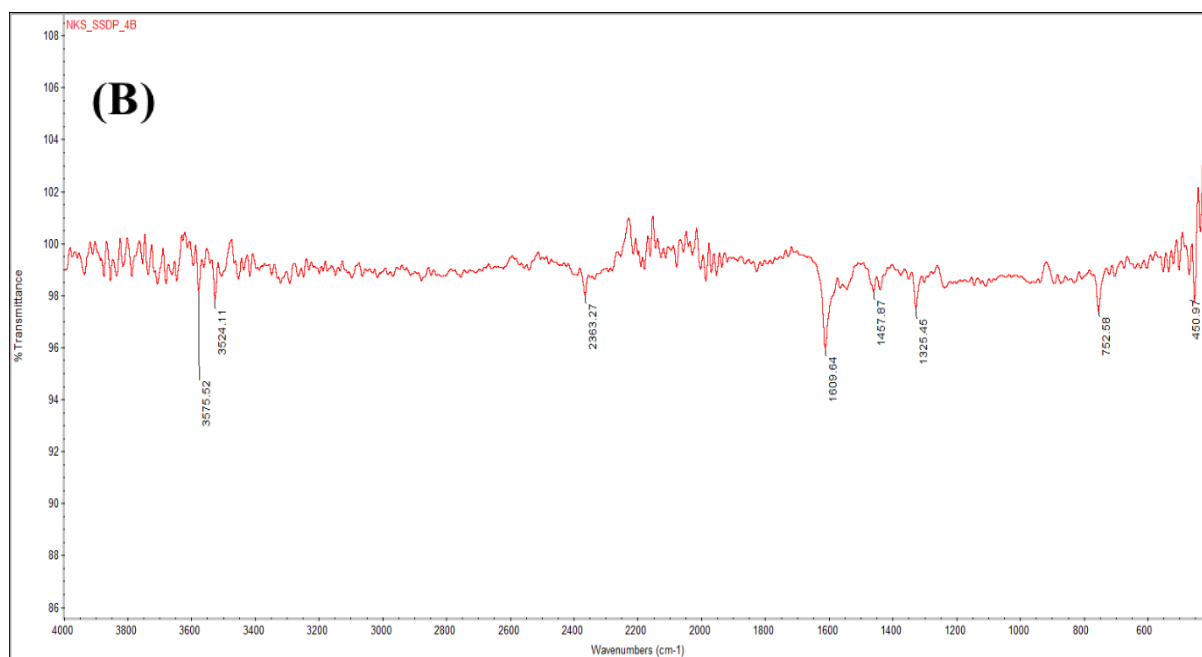

**Figure S7. (A) FTIR Spectra of Ligands 4c & (B) FTIR Spectra of Cu complex 4c.**

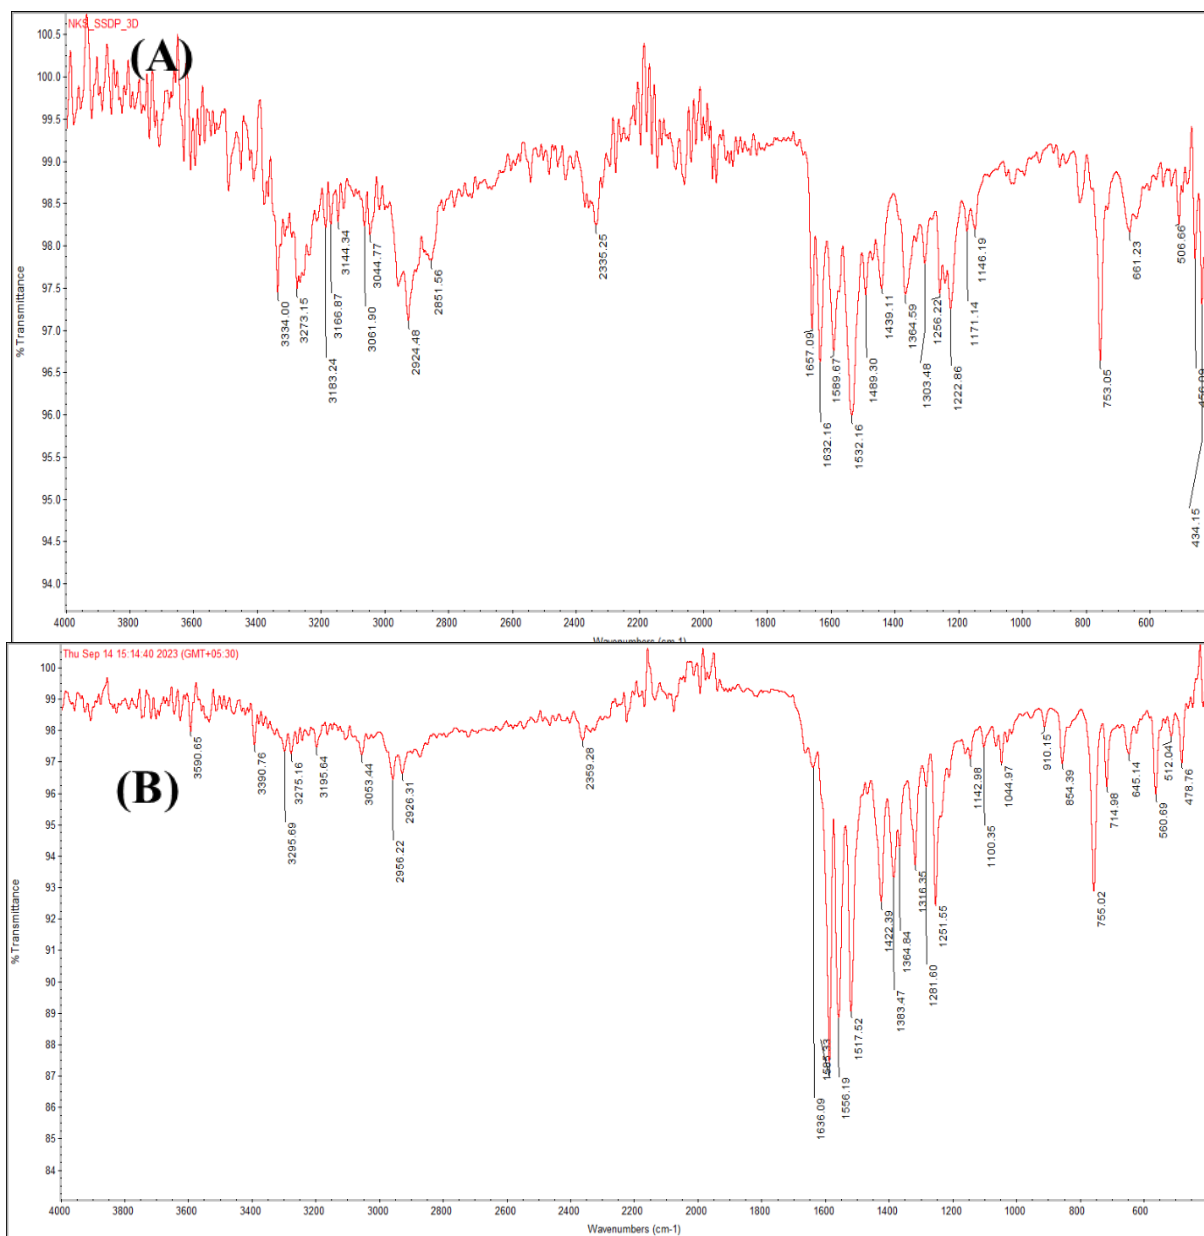

**Figure S8. (A) FTIR Spectra of Ligands 4d & (B) FTIR Spectra of Cu complex 4d.**

#### 4. EPR Spectra of Ligands 3a-3d & Cu complex 4a-4d

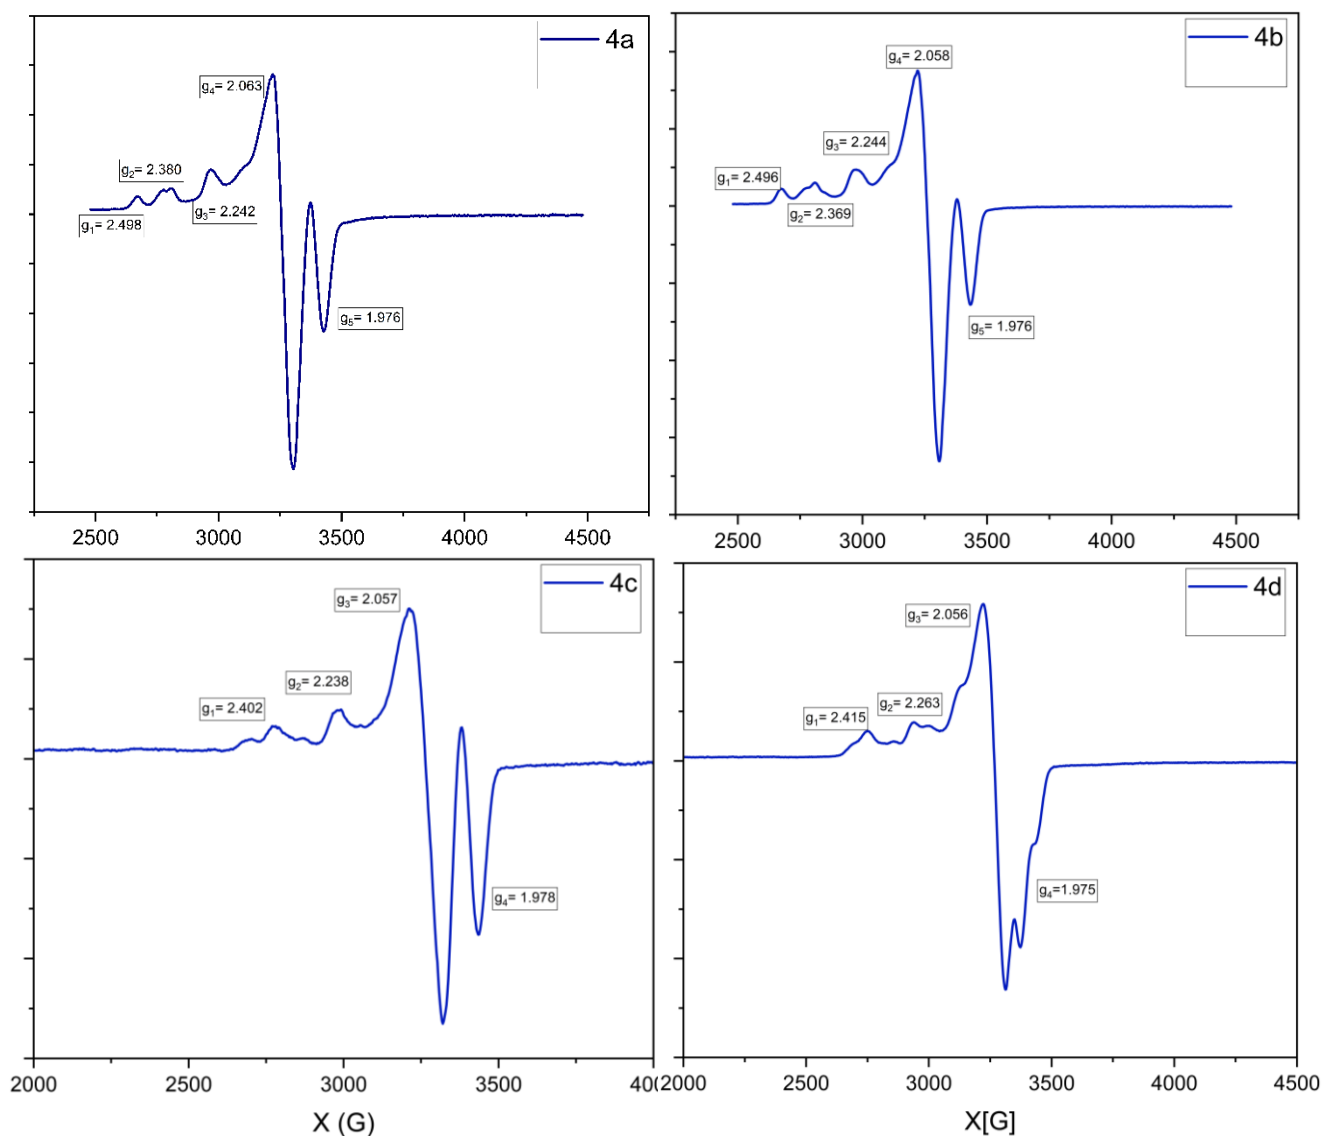

**Figure S9.** EPR Spectra of Ligands 3a-3d & Cu complex 4a-4d.

#### 5. X-Ray Crystal structure of Cu complex 4a-4c.

The crystal data of all peptides Cu complexes were collected on Rigaku Oxford diffractometer at 293 K respectively. SHELXT1 and Olex2 software was used for structure solution and packing diagram carried out by DIAMOND-3.3 software.

**Table S2.** *Crystal data and structure refinement for peptide 4a (CCDC No-2326996)*

| Identification code                         | <i>4a</i> (CCDC No-2326996)                                     |
|---------------------------------------------|-----------------------------------------------------------------|
| Empirical formula                           | C <sub>15</sub> H <sub>13</sub> CuN <sub>3</sub> O <sub>3</sub> |
| Formula weight                              | 346.83                                                          |
| Temperature/K                               | 297.15                                                          |
| Crystal system                              | monoclinic                                                      |
| Space group                                 | P2 <sub>1</sub> /c                                              |
| a/Å                                         | 11.3112(9)                                                      |
| b/Å                                         | 6.6485(5)                                                       |
| c/Å                                         | 18.4942(14)                                                     |
| α/°                                         | 90                                                              |
| β/°                                         | 104.164(8)                                                      |
| γ/°                                         | 90                                                              |
| Volume/Å <sup>3</sup>                       | 1348.53(19)                                                     |
| Z                                           | 4                                                               |
| ρ <sub>calc</sub> /cm <sup>3</sup>          | 1.7082                                                          |
| μ/mm <sup>-1</sup>                          | 1.636                                                           |
| F(000)                                      | 709.6                                                           |
| Crystal size/mm <sup>3</sup>                | 0.31 × 0.22 × 0.18                                              |
| Radiation                                   | Mo Kα (λ = 0.71073)                                             |
| 2θ range for data collection/°              | 7.16 to 52.72                                                   |
| Index ranges                                | -14 ≤ h ≤ 14, -8 ≤ k ≤ 8, -23 ≤ l ≤ 23                          |
| Reflections collected                       | 12828                                                           |
| Independent reflections                     | 2748 [R <sub>int</sub> = 0.0586, R <sub>sigma</sub> = 0.0488]   |
| Data/restraints/parameters                  | 2748/0/200                                                      |
| Goodness-of-fit on F <sup>2</sup>           | 1.029                                                           |
| Final R indexes [I ≥ 2σ (I)]                | R <sub>1</sub> = 0.0319, wR <sub>2</sub> = 0.0783               |
| Final R indexes [all data]                  | R <sub>1</sub> = 0.0381, wR <sub>2</sub> = 0.0814               |
| Largest diff. peak/hole / e Å <sup>-3</sup> | 0.37/-0.35                                                      |

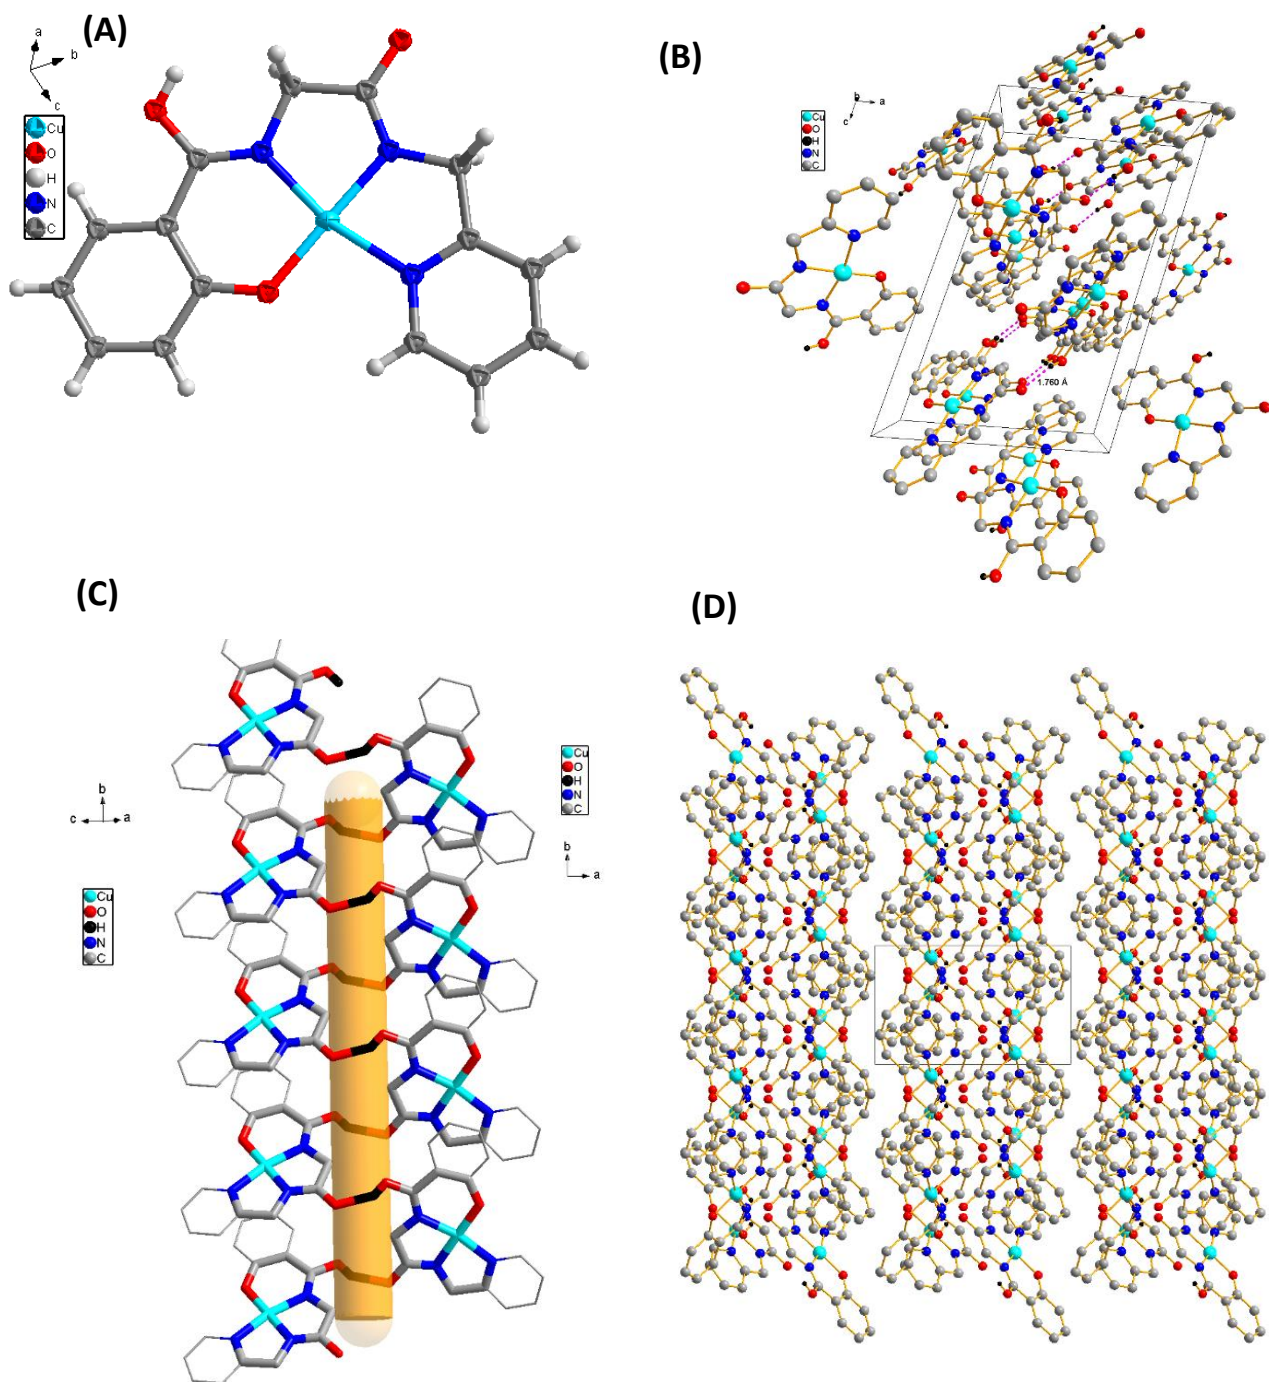

**Figure S10.** Structural analysis of SAP's Cu complex **4a** (A) ORTEP Diagram of **4a** (B-D) Structure and unit cell packing diagram of **4a**.

**Table S3.** Crystal data and structure refinement for Cu complex **4b** (CCDC No-232699)

|                                                   |                                                                 |
|---------------------------------------------------|-----------------------------------------------------------------|
| <b>Identification code</b>                        | <b>4b (CCDC No-2326997)</b>                                     |
| <b>Empirical formula</b>                          | C <sub>16</sub> H <sub>14</sub> CuN <sub>3</sub> O <sub>3</sub> |
| <b>Formula weight</b>                             | 360.86                                                          |
| <b>Temperature/K</b>                              | 298.15                                                          |
| <b>Crystal system</b>                             | triclinic                                                       |
| <b>Space group</b>                                | P-1                                                             |
| <b>a/Å</b>                                        | 7.2629(2)                                                       |
| <b>b/Å</b>                                        | 10.8594(4)                                                      |
| <b>c/Å</b>                                        | 11.3480(4)                                                      |
| <b>α/°</b>                                        | 114.939(4)                                                      |
| <b>β/°</b>                                        | 104.016(3)                                                      |
| <b>γ/°</b>                                        | 96.535(3)                                                       |
| <b>Volume/Å<sup>3</sup></b>                       | 763.32(6)                                                       |
| <b>Z</b>                                          | 2                                                               |
| <b>ρ<sub>calc</sub>/cm<sup>3</sup></b>            | 1.5699                                                          |
| <b>μ/mm<sup>-1</sup></b>                          | 1.449                                                           |
| <b>F(000)</b>                                     | 370.8                                                           |
| <b>Crystal size/mm<sup>3</sup></b>                | 0.01 × 0.01 × 0.002                                             |
| <b>Radiation</b>                                  | Mo Kα (λ = 0.71073)                                             |
| <b>2θ range for data collection/°</b>             | 7.14 to 52.74                                                   |
| <b>Index ranges</b>                               | -9 ≤ h ≤ 10, -14 ≤ k ≤ 14, -15 ≤ l ≤ 15                         |
| <b>Reflections collected</b>                      | 17422                                                           |
| <b>Independent reflections</b>                    | 3109 [R <sub>int</sub> = 0.0413, R <sub>sigma</sub> = 0.0299]   |
| <b>Data/restraints/parameters</b>                 | 3109/0/211                                                      |
| <b>Goodness-of-fit on F<sup>2</sup></b>           | 1.040                                                           |
| <b>Final R indexes [I ≥ 2σ (I)]</b>               | R <sub>1</sub> = 0.0251, wR <sub>2</sub> = 0.0642               |
| <b>Final R indexes [all data]</b>                 | R <sub>1</sub> = 0.0273, wR <sub>2</sub> = 0.0654               |
| <b>Largest diff. peak/hole / e Å<sup>-3</sup></b> | 0.32/-0.28                                                      |

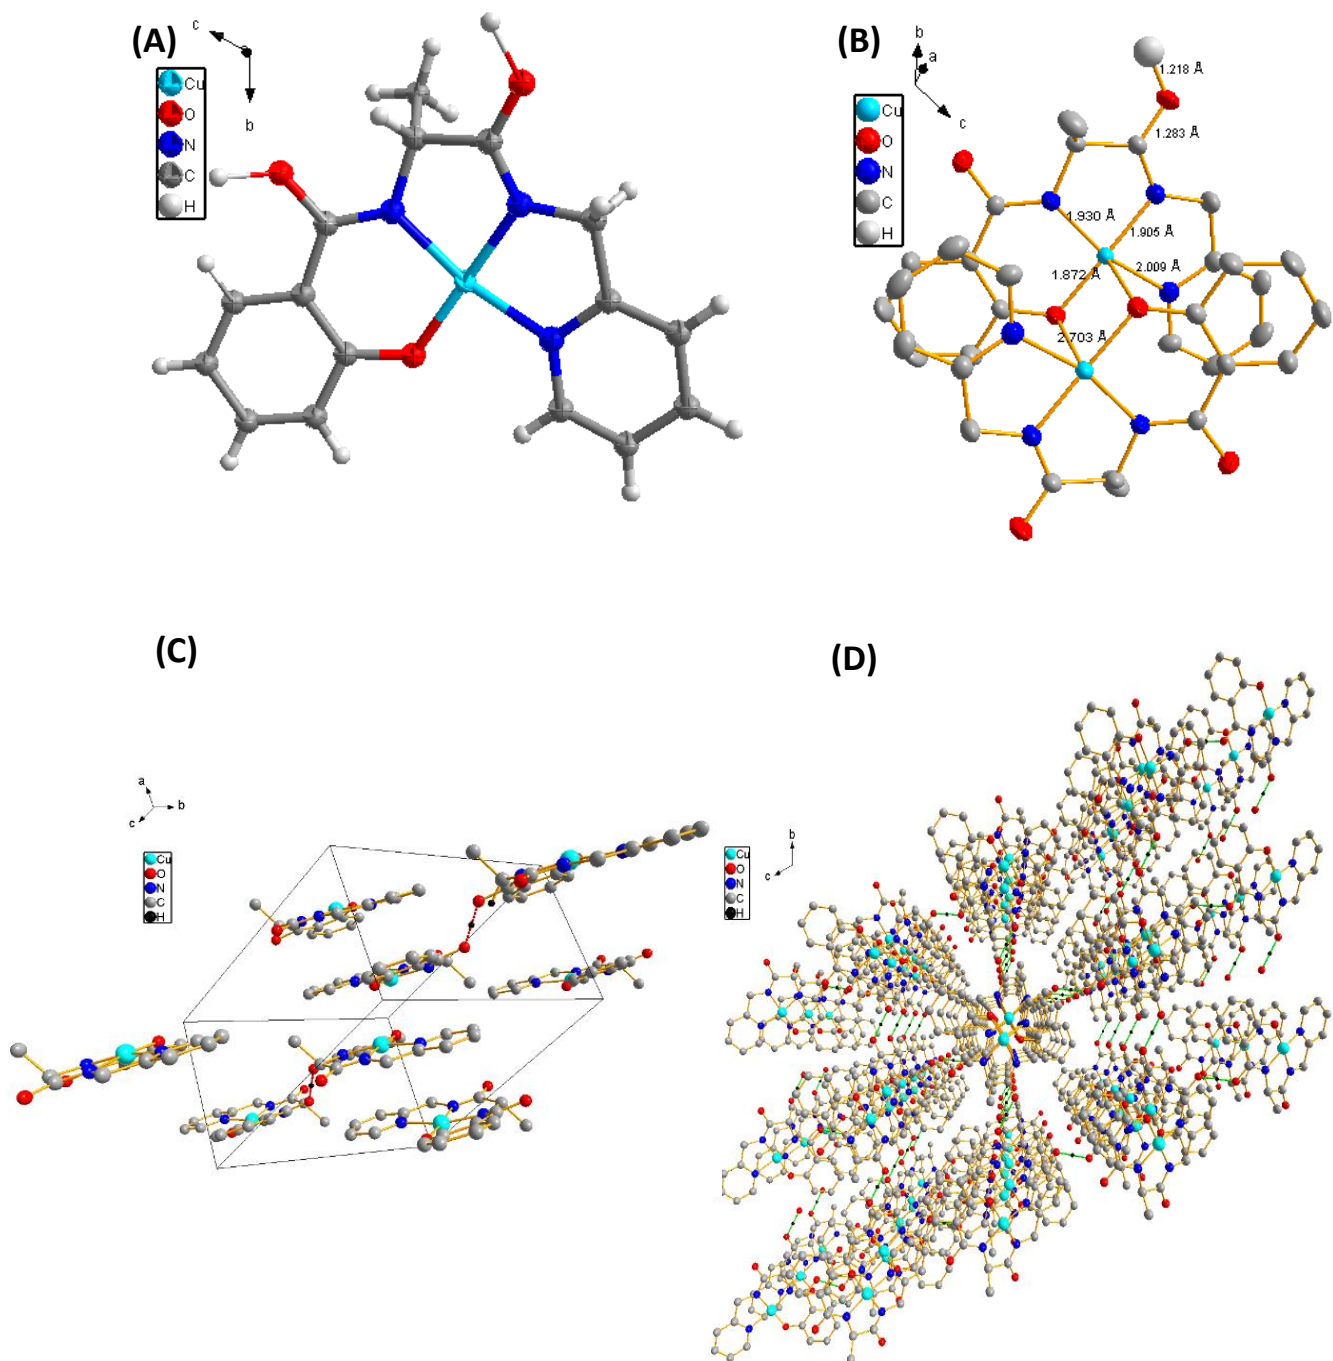

**Figure S11.** Structural analysis of SAP's Cu complex **4b** (A) ORTEP Diagram of **4b** (B-D) Structure and unit cell packing diagram of **4b**.



**Table S4.** Crystal data and structure refinement for Cu complex **4C** (CCDC No-2326998).

| <b>Table S8</b>                                |                                                               |
|------------------------------------------------|---------------------------------------------------------------|
| Identification code                            | <b>4c (CCDC No-2326998)</b>                                   |
| Empirical formula                              | $C_{3.13}H_{3.3}Cu_{0.17}N_{0.52}O_{0.52}$                    |
| Formula weight                                 | 67.637                                                        |
| Temperature/K                                  | 296                                                           |
| Crystal system                                 | monoclinic                                                    |
| Space group                                    | $P2_1/n$                                                      |
| a/Å                                            | 7.3019(1)                                                     |
| b/Å                                            | 13.8300(2)                                                    |
| c/Å                                            | 16.2105(2)                                                    |
| $\alpha/^\circ$                                | 90                                                            |
| $\beta/^\circ$                                 | 94.256(1)                                                     |
| $\gamma/^\circ$                                | 90                                                            |
| Volume/Å <sup>3</sup>                          | 1632.51(4)                                                    |
| Z                                              | 23                                                            |
| $\rho_{\text{calc}}/\text{cm}^3$               | 1.582                                                         |
| $\mu/\text{mm}^{-1}$                           | 2.090                                                         |
| F(000)                                         | 798.6                                                         |
| Crystal size/mm <sup>3</sup>                   | 0.1 × 0.01 × 0.01                                             |
| Radiation                                      | Cu K $\alpha$ ( $\lambda = 1.54184$ )                         |
| 2 $\Theta$ range for data collection/ $^\circ$ | 8.42 to 156.42                                                |
| Index ranges                                   | $-8 \leq h \leq 6, -16 \leq k \leq 17, -20 \leq l \leq 20$    |
| Reflections collected                          | 13438                                                         |
| Independent reflections                        | 3368 [ $R_{\text{int}} = 0.0405, R_{\text{sigma}} = 0.0320$ ] |
| Data/restraints/parameters                     | 3368/0/229                                                    |
| Goodness-of-fit on F <sup>2</sup>              | 1.028                                                         |
| Final R indexes [ $I \geq 2\sigma(I)$ ]        | $R_1 = 0.0341, wR_2 = 0.0970$                                 |
| Final R indexes [all data]                     | $R_1 = 0.0367, wR_2 = 0.0996$                                 |
| Largest diff. peak/hole / e Å <sup>-3</sup>    | 0.26/-0.46                                                    |

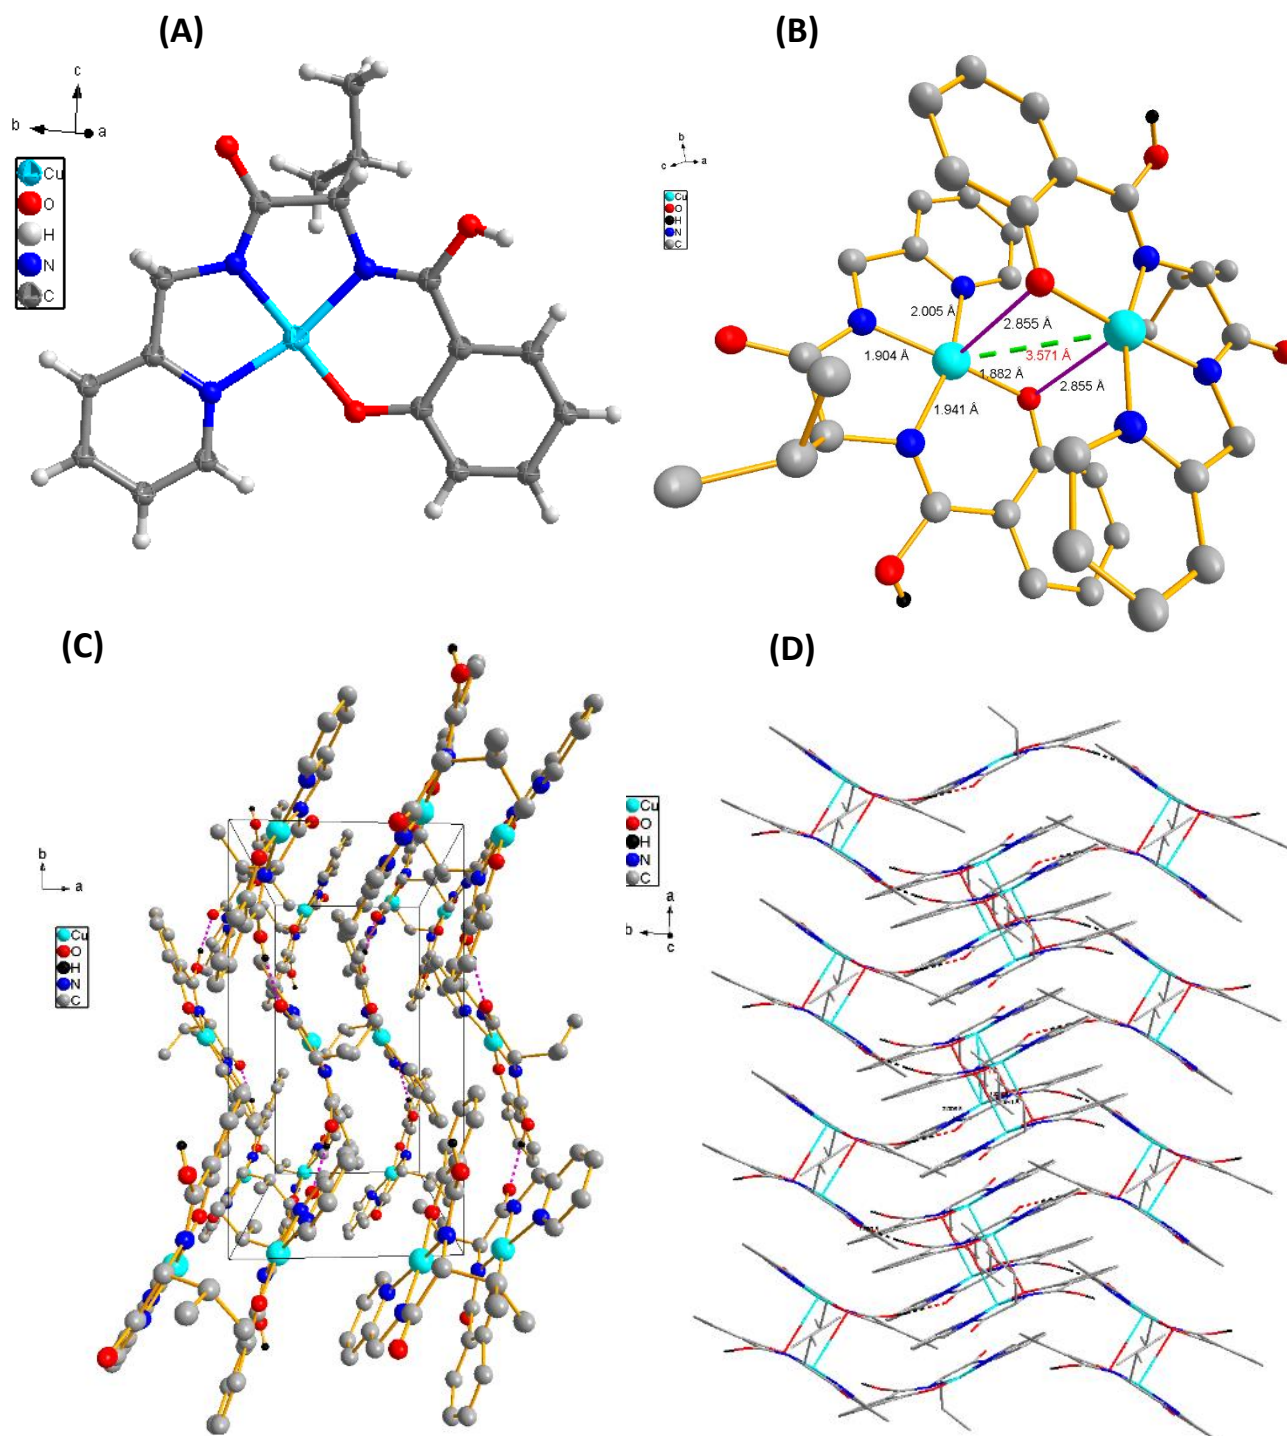

**Figure S12.** Structural analysis of SAP's Cu complex **4c** (A) ORTEP Diagram of **4c** (B-D) Structure and unit cell packing diagram of **4c**.

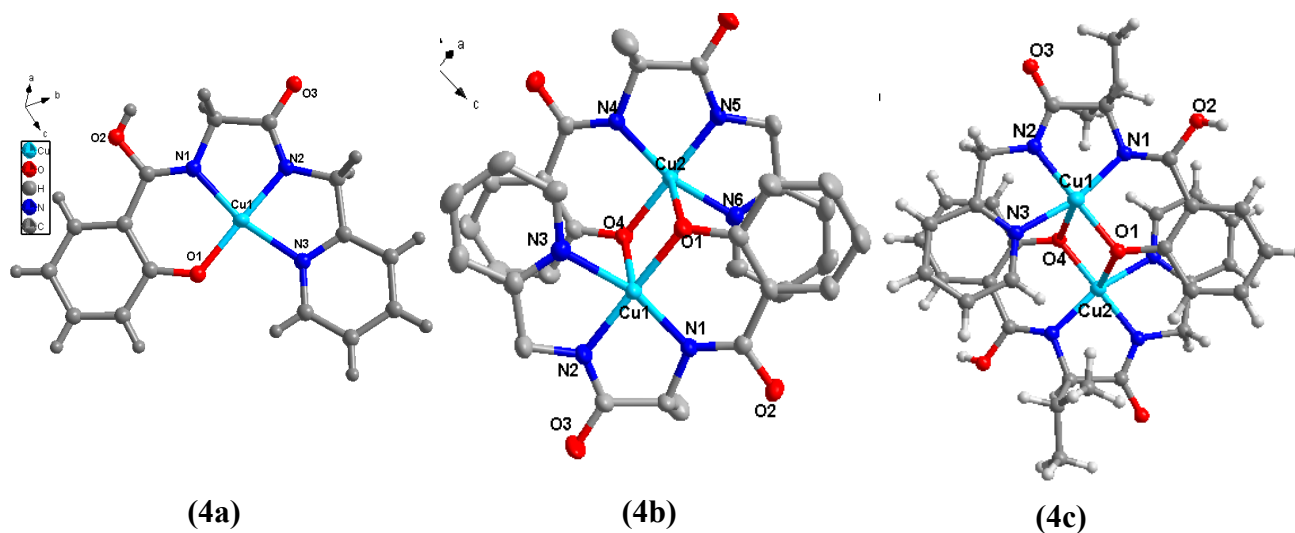

**Figure S13.** X-ray structure of the Cu (II) complexes (**4a**, **4b**, **4c**).

**Table S5.** Selected structural parameters observed in the solid-state structure of **4a**, **4b**, **4c**.

| Bond Length (Å)       |       | Bond Angle (°) |        |
|-----------------------|-------|----------------|--------|
| For complex <b>4a</b> |       |                |        |
| <b>Cu1-N1</b>         | 1.933 | N1-Cu1-O2      | 96.827 |
| <b>Cu1-N2</b>         | 1.904 | N1-Cu1-N2      | 84.149 |
| <b>Cu1-N3</b>         | 1.997 | N1-Cu1-N3      | 82.115 |
| <b>Cu1-O1</b>         | 1.860 |                |        |
| For complex <b>4b</b> |       |                |        |
| <b>Cu1-N1</b>         | 1.930 | O1-Cu1-N1      | 96.696 |
| <b>Cu1-N2</b>         | 1.905 | N1-Cu1-N2      | 83.752 |
| <b>Cu1-N3</b>         | 2.009 | N2-Cu1-N3      | 81.962 |
| <b>Cu1-O1</b>         | 1.872 | O1-Cu1-O4      | 85.406 |
| <b>Cu1-O4</b>         | 2.703 | Cu1-O4-Cu2     | 94.594 |
| For complex <b>4c</b> |       |                |        |
| <b>Cu1-N1</b>         | 1.941 | O1-Cu1-N1      | 96.549 |
| <b>Cu1-N2</b>         | 1.904 | N1-Cu1-N2      | 83.906 |
| <b>Cu1-N3</b>         | 2.005 | N2-Cu1-N3      | 82.312 |
| <b>Cu1-O1</b>         | 1.882 | Cu1-O4-Cu2     | 95.644 |

## 6. Scanning Electron Microscopy (SEM)

A thin layer sample of Cu-complex 4a, 4b, 4c & 4d were prepared from dropping of EtOH mixture of these samples on silicon wafer and then we recorded their SEM image. SEM images in nano-scales, at selectively resolution (1-100um) are illustrated in **Figure (S8-S11)**.

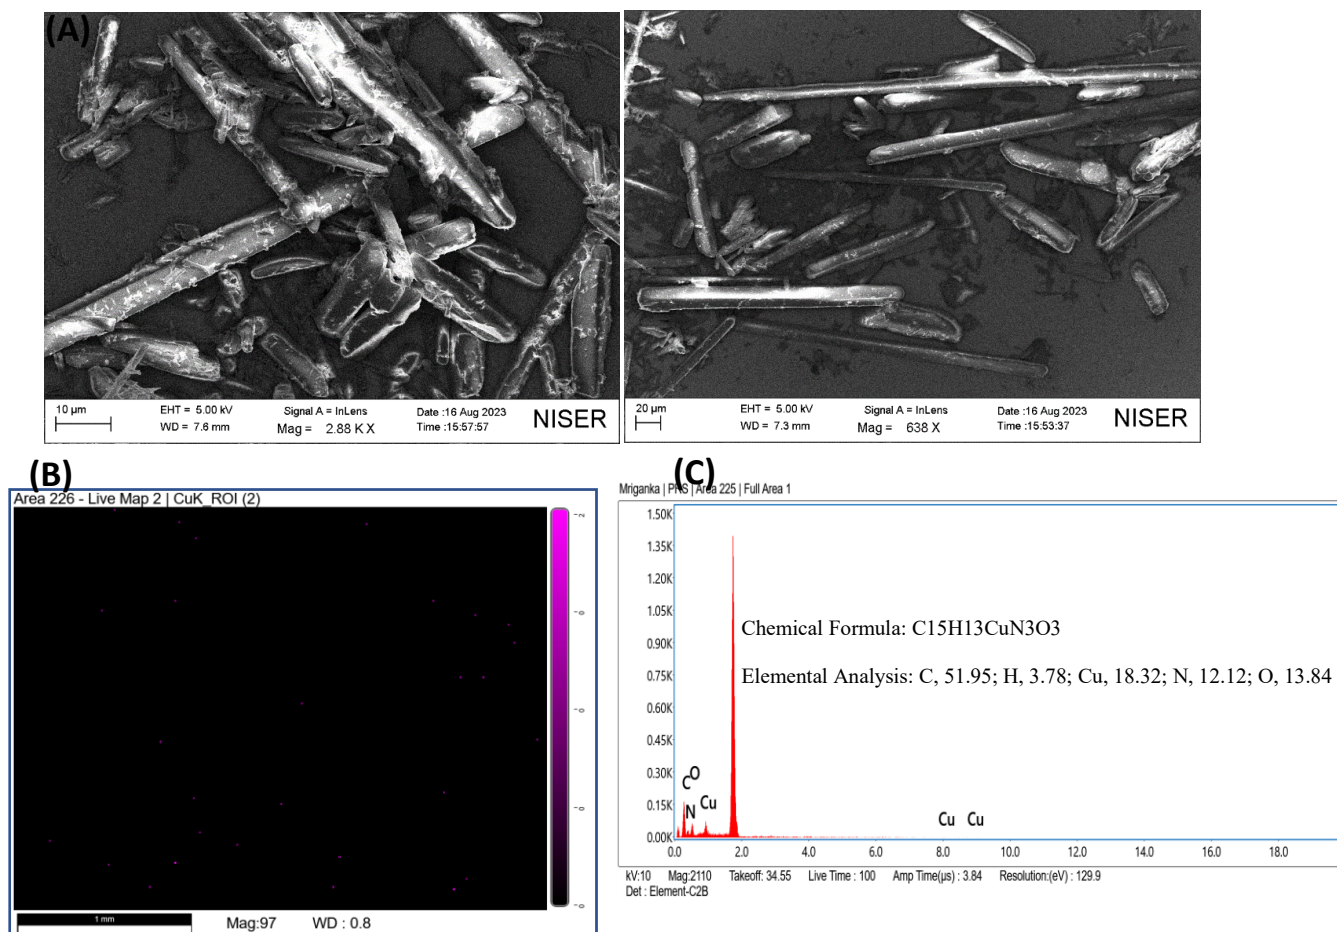

**Figure S14.** (A) SEM image of 4a (B-C) Mapping & EDAX spectra of 4a

**Table S6.** Elemental analysis 4a.

| Element | Weight % | Atomic % | Net Int. |
|---------|----------|----------|----------|
| C K     | 41.20    | 54.30    | 11.10    |
| N K     | 17.70    | 20.00    | 2.00     |
| O K     | 20.80    | 20.60    | 3.80     |
| Cu L    | 20.30    | 5.10     | 2.80     |

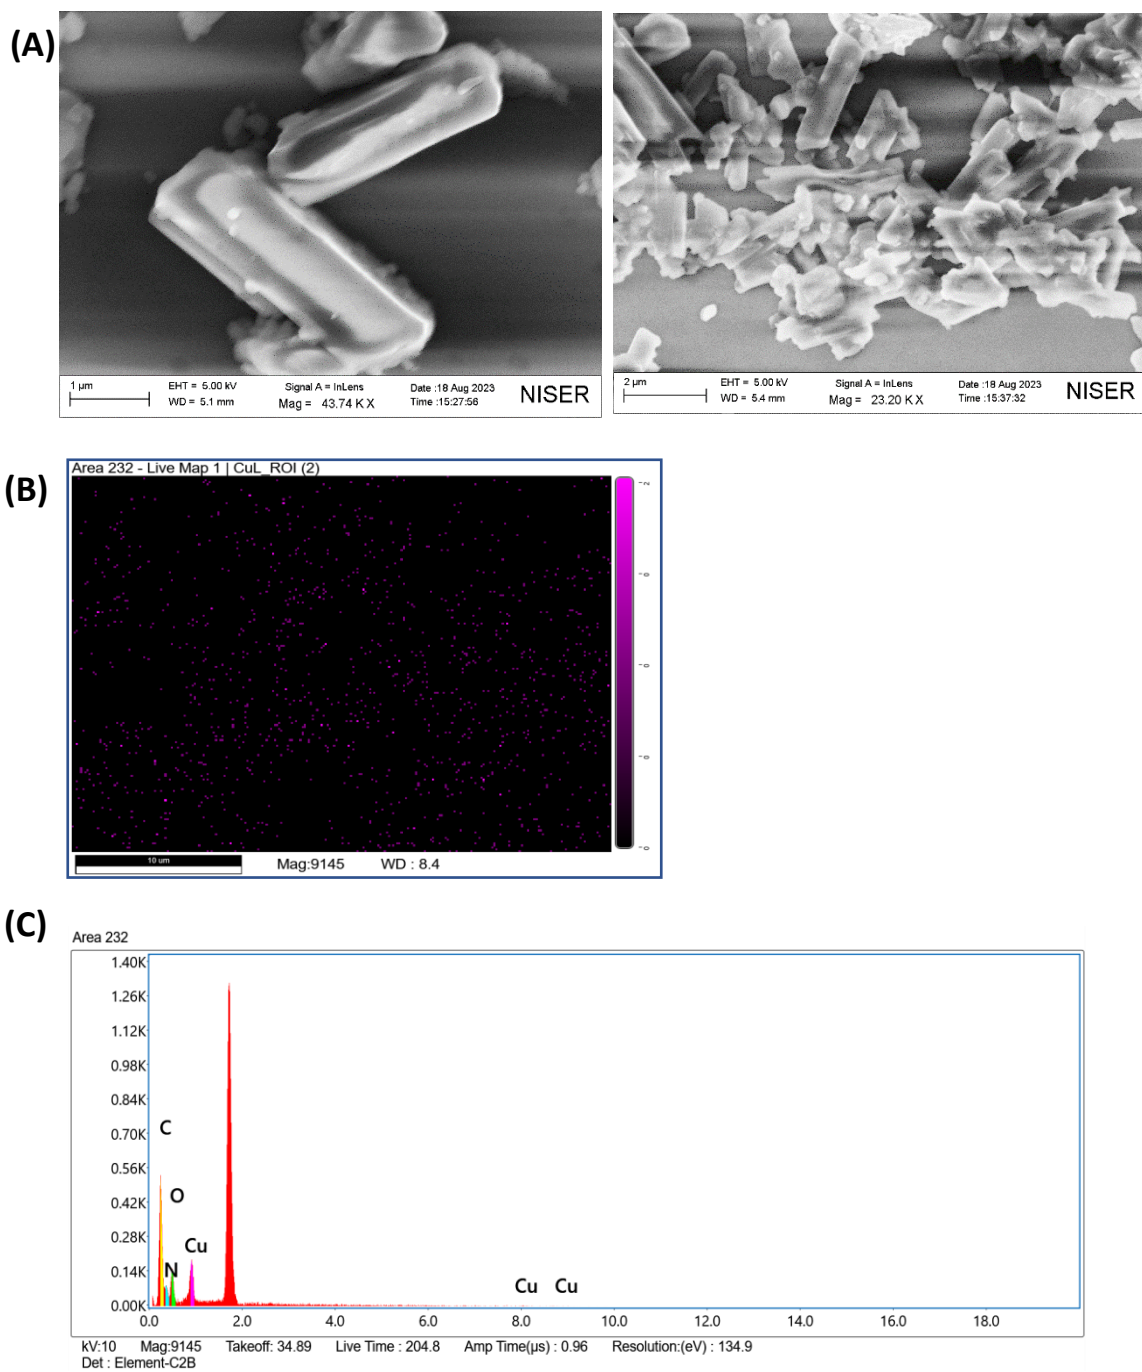

**Figure S15.** (A) SEM image of **4b** (B) Mapping & EDAX spectra of **4b**

**Table S7.** . Elemental analysis **4b**.

| Element | Weight % | Atomic % | Net Int. |
|---------|----------|----------|----------|
| C K     | 46.20    | 60.90    | 20.20    |
| N K     | 15.70    | 17.70    | 2.60     |
| O K     | 16.10    | 15.90    | 4.60     |
| Cu L    | 22.10    | 5.50     | 5.10     |

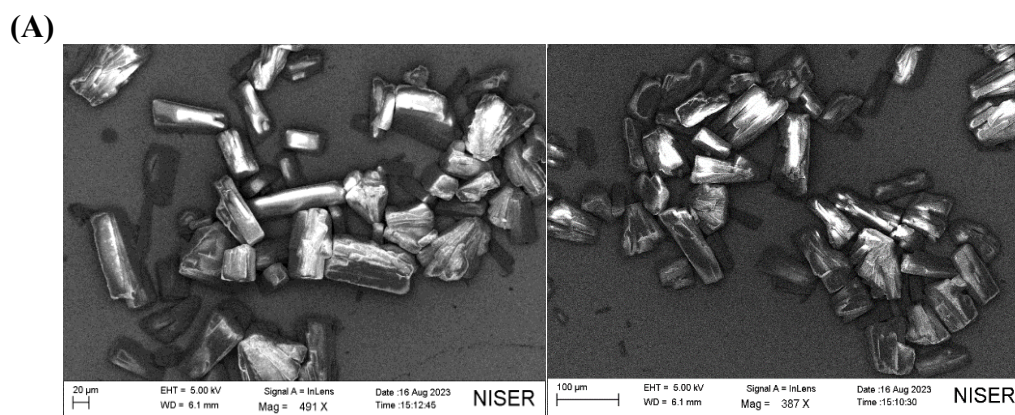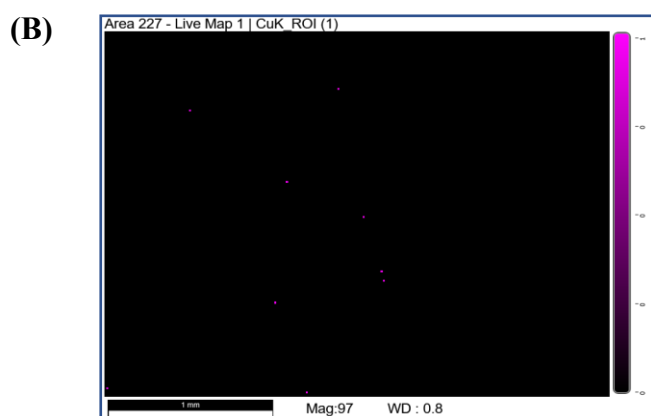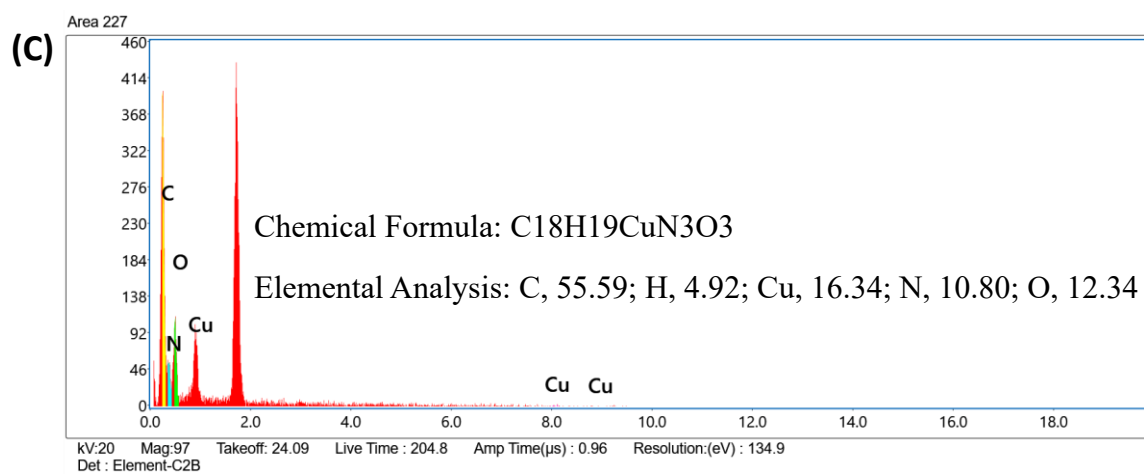

**Figure S16.** (A) SEM image of **4c** (B) Mapping & EDAX spectra of **4c**.

**Table S8.** . Elemental analysis **4c**

| Element | Weight % | Atomic % | Net Int. |
|---------|----------|----------|----------|
| C K     | 46.60    | 52.30    | 15.50    |
| N K     | 24.50    | 23.60    | 1.80     |
| O K     | 28.60    | 24.10    | 3.30     |
| Cu K    | 0.30     | 0.10     | 0.10     |

(A)

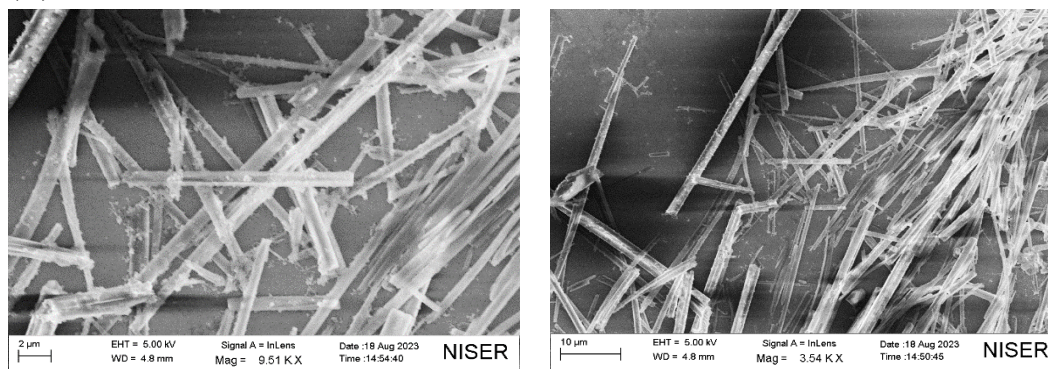

(B)

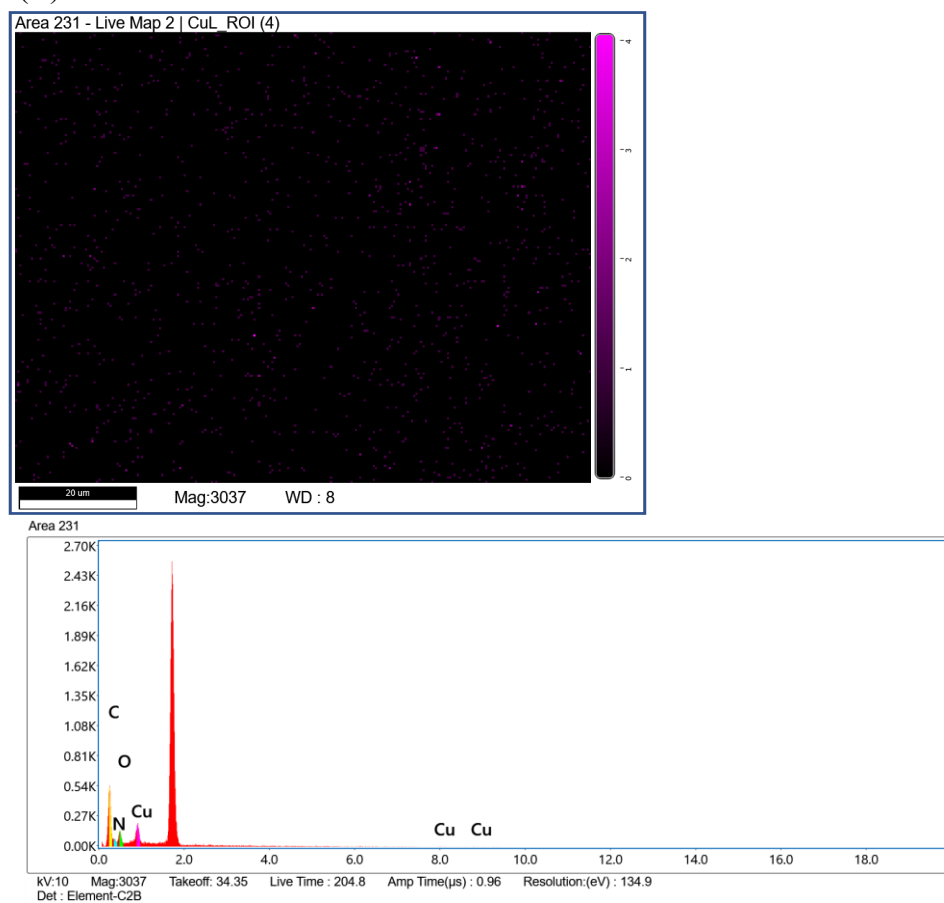

**Figure S17.** (A) SEM image of **4d** (B) Mapping & EDAX spectra of **4d**

**Table S9.** . Elemental analysis **4d**.

| Element | Weight % | Atomic % | Net Int. |
|---------|----------|----------|----------|
| C K     | 49.70    | 65.60    | 20.20    |
| N K     | 12.70    | 14.40    | 1.80     |
| O K     | 14.40    | 14.20    | 3.90     |
| Cu L    | 23.30    | 5.80     | 5.10     |

## 7. DNA Cleavage Assay

The study investigated the ability of copper (II) complexes to cleave pcDNA 3.1 myc plasmid DNA (100ng) when hydrogen peroxide (250  $\mu$ M) was present as an activator. This was done using agarose gel electrophoresis in a 10 mM Tris–HCl/50 mM NaCl buffer (pH 7.4) at 37°C. The competence of the complexes as nucleases was assessed by their capacity to convert supercoiled DNA (form I) into nicked circular DNA (form II) and further into linear DNA (form III), which migrate at different rates in the gel. Over time, the complexes demonstrated an increasing ability to cleave the DNA, leading to a gradual reduction in the quantity of pcDNA 3.1 myc plasmid DNA. The control in lane 1 showed no cleavage of the supercoiled DNA when no complex was added. Plasmid DNA incubated with complex alone (lanes 7-10) did not alter the supercoiled form. However, in the presence of hydrogen peroxide ( $H_2O_2$ ), the copper (II) complexes were able to cleave the supercoiled plasmid DNA (Lane 3-6). The distribution of supercoiled, nicked circular, and linear forms of DNA in the agarose gels provide insight into the extent of DNA cleavage by these complexes.

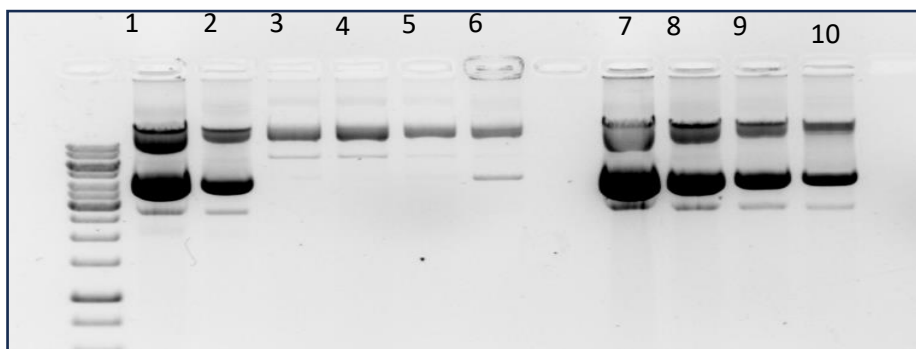

**Figure S18.** Lane (1) pcDNA3.1 myC (100 ng), Lane (2) pcDNA3.1 myC (100 ng) +  $H_2O_2$  (250 $\mu$ M), Lane (3-6) pcDNA3.1 myC (100 ng) +  $H_2O_2$ (250 $\mu$ M) + **4a-4d**, Lane (7-10) pcDNA3.1 myC (100 ng) +**4a-4d**.



*Time course of the DNA cleavage activity of Cu complex*

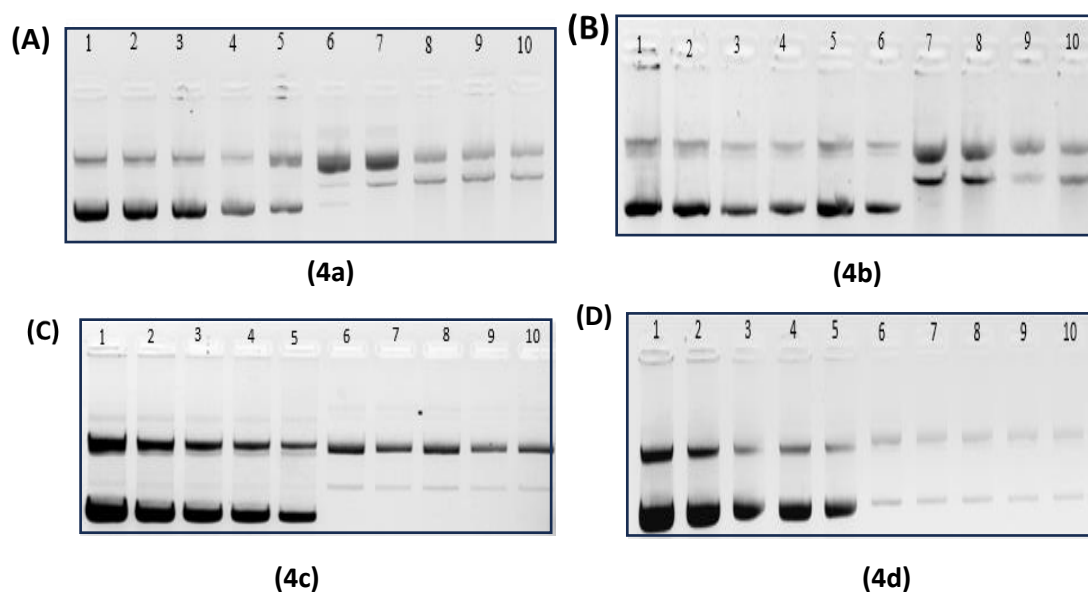

**Figure S19.** (Lane 1-10) pcDNA3.1 myC (100 ng) + H<sub>2</sub>O<sub>2</sub> (250μM) +**4a-4d** (0,5, 15, 30, 45, 60, 90, 120, 150, 180 min)

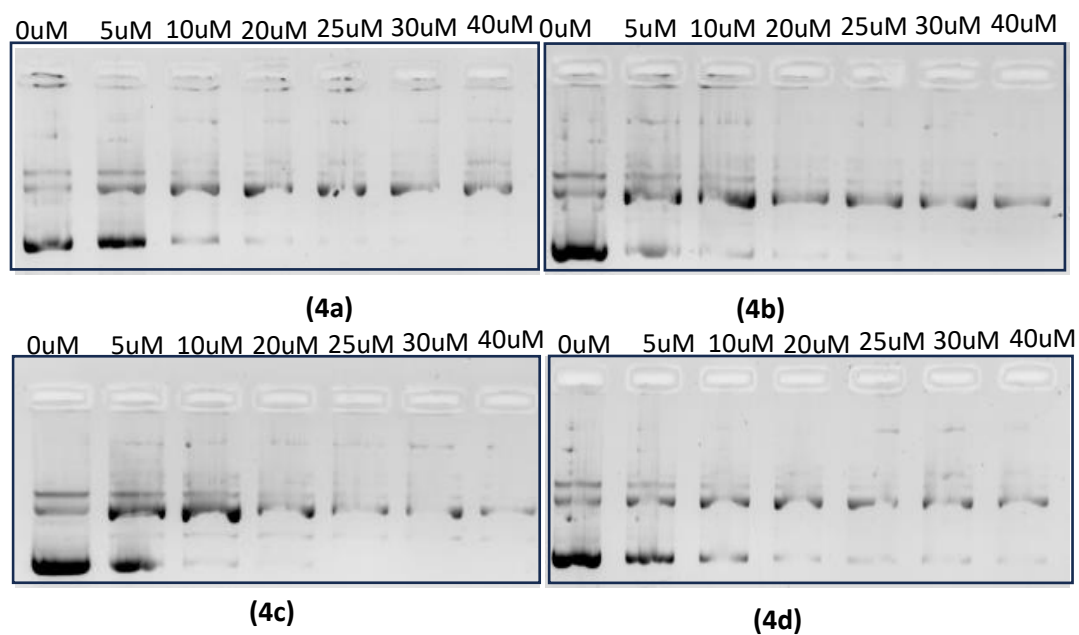

**Figure S20** pcDNA3.1 myC (100 ng) + Ascorbic Acid (250μM) +**4a-4d** (0-40μM) after incubation time of 30min at 37°C.

## 8. Cell proliferation assay of SAP's Cu complexes

In this experiment, two cell lines, Hek293T and HeLa cells, were cultured in a 96-well microtiter plate in 10% DMEM. After a 10-hour incubation, the medium was aspirated, and cell morphology and confluency were examined. SAP's Cu complex solutions at various concentrations, along with media and a DMSO control, were added in triplicate to the wells. The plate was then incubated for 24 hours in a standard condition (humid incubator, 5% CO<sub>2</sub>, 37°C). To assess cell proliferation, CellTiter 96® Aqueous One Solution reagent (10µl) was added to each well containing the samples in 190µl of culture medium. The plate was incubated for an additional hour under standard conditions. After incubation, absorbance was measured at 490 nm using the Varioskan Flash multimode method. This analysis provided insights into the cell proliferation ability in the presence of different peptide concentrations, with the controls serving as references for comparison.

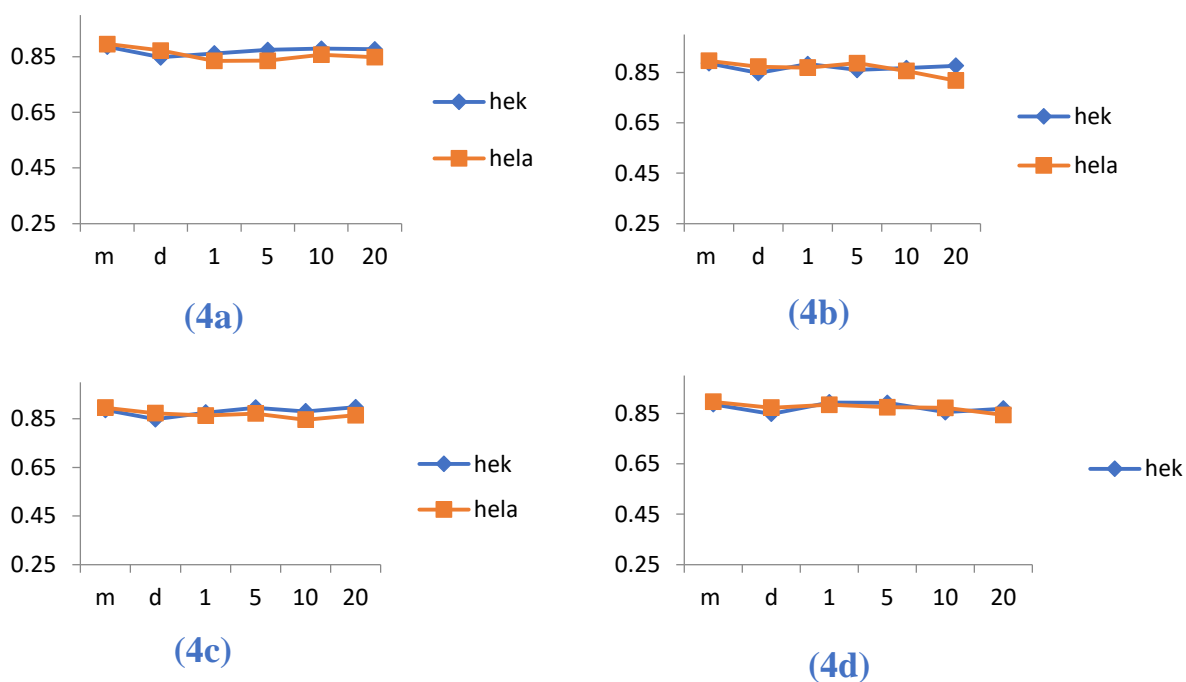

**Figure S21.** Cell viability of HeLa cells and Heck 293T cells after incubation with SAPs Cu complexes **4a-4d**.

## 9. Theoretical Molecular docking studies

We performed molecular docking with two SAP-Cu complexes with reported DNA duplex structure (PDB ID 1BNA) using freely available AutoDock Vina software.<sup>1</sup> Their interactions are viewed by the molecular modeling software PyMol. The molecular model of SAP-Cu (3a-Cu) shows that complex bind with DNA in a minor groove site with binding affinity -8.1 kcal/mol through two hydrogen bonding ( $\sim 2.8\text{\AA}$ ) with two guanine residue. However, the molecular model of SAP-Cu (3c-Cu) shows that complex bind with DNA in minor groove site with binding affinity -7.9 kcal/mol through two hydrogen bonding ( $\sim 2.8\text{\AA}$ ) with one guanine and backbone 2'-O oxygen residue.

(a) Docking of Complex **4a** (SAP3c-Cu) with DNA duplex structure (PDB ID 1BNA).

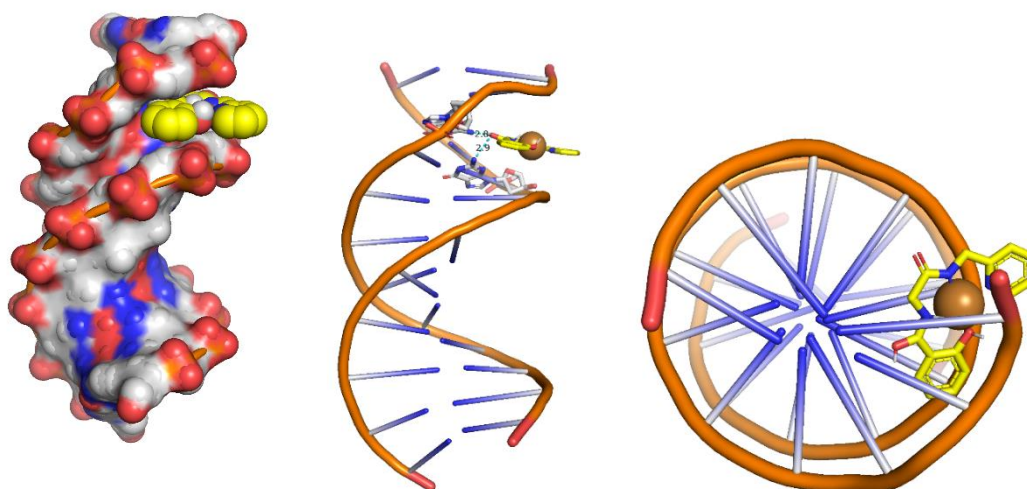

(b)

**Figure S22.** Docking images of complex **4a** in different viewing modes.

Software: AutoDock Vina

Binding affinity: -8.1 kcal/mol

Two Hydrogen bonds: Salicylamide C=O-----H-N<sup>(Guanine)</sup>, 2.9Å and 2.8Å

If you used AutoDock Vina in your work, please cite: O. Trott, A. J. Olson, AutoDock Vina: improving the speed and accuracy of docking with a new scoring function, efficient optimization and multithreading, Journal of Computational Chemistry 31 (2010) 455-461 (DOI 10.1002/jcc.21334) Please see <http://vina.scripps.edu> for more information.

WARNING: The search space volume > 27000 Angstrom<sup>3</sup> (See FAQ)

Detected 8 CPUs

Reading input ... done.

Setting up the scoring function ... done.

Analyzing the binding site ... done.

Using random seed: 2054660232  
 Performing search ... done.  
 Refining results ... done.

**Table S10.** Output data of Autodock analyses 4a..

| mode     | affinity<br>(kcal/mol) | dist from best mode<br>rmsd l.b.   rmsd u.b. |              |
|----------|------------------------|----------------------------------------------|--------------|
| <b>1</b> | <b>-8.1</b>            | <b>0.000</b>                                 | <b>0.000</b> |
| 2        | -8.0                   | 22.221                                       | 24.298       |
| 3        | -7.9                   | 20.223                                       | 22.411       |
| 4        | -7.8                   | 2.069                                        | 5.375        |
| 5        | -7.7                   | 1.970                                        | 2.399        |
| 6        | -7.7                   | 1.905                                        | 5.256        |
| 7        | -7.5                   | 2.490                                        | 6.729        |
| 8        | -7.4                   | 21.857                                       | 23.737       |
| 9        | -7.4                   | 4.005                                        | 7.713        |

Writing output ... done.

(c) Docking of Complex 4c (SAP3c-Cu) with DNA duplex structure (PDB ID 1BNA)

Software: AutoDock Vina

Binding affinity: -7.9 kcal/mol

Two Hydrogen bonds: Salicylamide C=O-----H-N<sup>(Guanine)</sup> 2.9Å

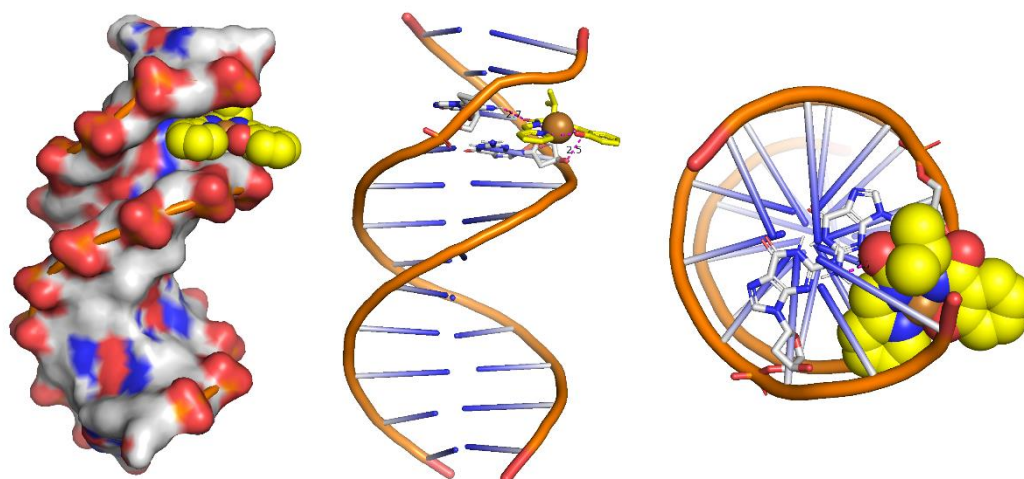

**Figure S23.** Docking images of complex 4c in different viewing modes.

Hydrogen bond C=O-----H-N(Guanine), 2.5Å and backbone 2'-Oxygen deoxyribose with salicylic enolic OH (2.8Å)

WARNING: The search space volume > 27000 Angstrom<sup>3</sup> (See FAQ)

Detected 8 CPUs

Reading input ... done.

Setting up the scoring function ... done.

Analyzing the binding site ... done.

Using random seed: 623172056

Performing search ... done.

Refining results ... done.

**Table S11.** Output data of Autodock analyses **4c**.

| mode | affinity<br>(kcal/mol) | dist from best mode<br>rmsd l.b. | rmsd u.b. |
|------|------------------------|----------------------------------|-----------|
| 1    | -7.9                   | 0.000                            | 0.000     |
| 2    | -7.7                   | 23.770                           | 25.545    |
| 3    | -7.7                   | 2.379                            | 5.255     |
| 4    | -7.3                   | 1.395                            | 4.838     |
| 5    | -7.2                   | 3.057                            | 6.154     |
| 6    | -7.2                   | 1.911                            | 6.643     |
| 7    | -7.0                   | 24.506                           | 26.395    |
| 8    | -7.0                   | 25.962                           | 27.049    |
| 9    | -6.7                   | 27.114                           | 28.560    |

Writing output ... done.

## Reference

1. O. Trott, A. J. Olson, AutoDock Vina: improving the speed and accuracy of docking with a new scoring function, efficient optimization and multithreading, *Journal of Computational Chemistry* 31 (2010) 455-461 (DOI 10.1002/jcc.21334 )
